# Supplementary material
Source: PubMed Central journal article supplement (PMC8484279)

# 浙江大学医学院医学伦理委员会

## 科研项目申报伦理审批件

申伦第(2021-076)号

|                                                                                                                                                                                                                                                                                                                                                                                                                                                                     |                                                                                                                                                                           |                                                                                   |            |                                                                                   |      |     |
|---------------------------------------------------------------------------------------------------------------------------------------------------------------------------------------------------------------------------------------------------------------------------------------------------------------------------------------------------------------------------------------------------------------------------------------------------------------------|---------------------------------------------------------------------------------------------------------------------------------------------------------------------------|-----------------------------------------------------------------------------------|------------|-----------------------------------------------------------------------------------|------|-----|
| 项目名称                                                                                                                                                                                                                                                                                                                                                                                                                                                                | Msn 家族激酶 MINK1 在 NLRP3 炎症小体活化及急性炎症性疾病中的调控功能与机制研究                                                                                                                          |                                                                                   |            |                                                                                   |      |     |
| 申请部门                                                                                                                                                                                                                                                                                                                                                                                                                                                                | 医学院                                                                                                                                                                       |                                                                                   | 项目负责人: 鲁林荣 |                                                                                   |      |     |
| 报送材料                                                                                                                                                                                                                                                                                                                                                                                                                                                                | 科研项目伦理审查申请表 <input checked="" type="checkbox"/> 课题申报书 <input type="checkbox"/><br>研究方案和项目摘要 <input checked="" type="checkbox"/> 知情同意书 <input checked="" type="checkbox"/> |                                                                                   |            | 项目来源:<br>国家自然科学基金                                                                 |      |     |
| 审查                                                                                                                                                                                                                                                                                                                                                                                                                                                                  | 研究者资格: 符合要求 <input checked="" type="checkbox"/> 不符合要求 <input type="checkbox"/>                                                                                            |                                                                                   |            | 审查方式:                                                                             |      |     |
|                                                                                                                                                                                                                                                                                                                                                                                                                                                                     | 获取知情同意书方式: 适当 <input checked="" type="checkbox"/> 不适当 <input type="checkbox"/>                                                                                            |                                                                                   |            | 快速审查 <input checked="" type="checkbox"/>                                          |      |     |
|                                                                                                                                                                                                                                                                                                                                                                                                                                                                     | 试验方案: 适当 <input checked="" type="checkbox"/> 不适当 <input type="checkbox"/>                                                                                                 |                                                                                   |            | 会议审查 <input type="checkbox"/>                                                     |      |     |
| 伦理委员会<br>委员<br>签名                                                                                                                                                                                                                                                                                                                                                                                                                                                   | 委员姓名                                                                                                                                                                      | 签 名                                                                               | 委员姓名       | 签 名                                                                               | 委员姓名 | 签 名 |
|                                                                                                                                                                                                                                                                                                                                                                                                                                                                     | 柯越海                                                                                                                                                                       | 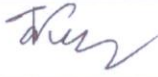 | 宋永新        |  |      |     |
|                                                                                                                                                                                                                                                                                                                                                                                                                                                                     |                                                                                                                                                                           |                                                                                   |            |                                                                                   |      |     |
|                                                                                                                                                                                                                                                                                                                                                                                                                                                                     |                                                                                                                                                                           |                                                                                   |            |                                                                                   |      |     |
|                                                                                                                                                                                                                                                                                                                                                                                                                                                                     |                                                                                                                                                                           |                                                                                   |            |                                                                                   |      |     |
|                                                                                                                                                                                                                                                                                                                                                                                                                                                                     |                                                                                                                                                                           |                                                                                   |            |                                                                                   |      |     |
| 结果                                                                                                                                                                                                                                                                                                                                                                                                                                                                  | 参会 <u>2</u> 人, 投票 <u>2</u> 人;<br>同意 <u>2</u> 票, 作必要修正后同意 <u>0</u> 票, 修改后再次会议讨论 <u>0</u> 票, 不同意 <u>0</u> 票。                                                                |                                                                                   |            |                                                                                   |      |     |
| 结论                                                                                                                                                                                                                                                                                                                                                                                                                                                                  | 同意                                                                                                                                                                        | 同意 稍作修改                                                                           | 修改后再次会议讨论  | 不同意                                                                               |      |     |
|                                                                                                                                                                                                                                                                                                                                                                                                                                                                     | √                                                                                                                                                                         |                                                                                   |            |                                                                                   |      |     |
| 审评意见:<br><br>经浙江大学医学院医学伦理委员会审议, 认为“Msn 家族激酶 MINK1 在 NLRP3 炎症小体活化及急性炎症性疾病中的调控功能与机制研究”研究方案及知情同意书符合伦理学原理要求, 同意申报项目。<br><br><br><br><br><br><br><br><br><br><div style="text-align: right; margin-right: 100px;">                     主任委员 (签名):<br/>                     浙江大学医学院医学伦理委员会 (盖章):                 </div> <div style="text-align: right; margin-right: 50px;">  </div> |                                                                                                                                                                           |                                                                                   |            |                                                                                   |      |     |

## 浙江大学医学院医学伦理委员会委员名单

| 伦理委员会职务 | 姓名  | 性别 | 专业    | 职称    | 工作单位           |
|---------|-----|----|-------|-------|----------------|
| 主任      | 柯越海 | 男  | 病理学   | 教授    | 浙江大学医学院        |
| 副主任     | 陈智  | 男  | 内科学   | 教授    | 浙江大学医学院附属第一医院  |
| 副主任     | 陈周闻 | 女  | 全科医学  | 副主任医师 | 浙江大学医学院        |
| 委员      | 施卫星 | 男  | 医学伦理学 | 教授    | 浙江大学医学院        |
| 委员      | 郑敏  | 女  | 传染病学  | 教授    | 浙江大学医学院附属第一医院  |
| 委员      | 吴志英 | 女  | 神经病学  | 教授    | 浙江大学医学院附属第二医院  |
| 委员      | 杨巍  | 男  | 神经生物学 | 教授    | 浙江大学医学院        |
| 委员      | 张丹  | 女  | 妇产科学  | 教授    | 浙江大学医学院        |
| 委员      | 夏大静 | 女  | 公共卫生学 | 教授    | 浙江大学医学院        |
| 委员      | 俞云松 | 男  | 危急重病学 | 教授    | 浙江大学医学院附属邵逸夫医院 |
| 委员      | 谢志坚 | 男  | 颌面外科学 | 教授    | 浙江大学医学院附属口腔医院  |
| 委员      | 毛建华 | 男  | 儿科学   | 教授    | 浙江大学医学院附属儿童医院  |
| 委员      | 戴慧芬 | 女  | 消化病学  | 研究员   | 浙江大学医学院        |
| 委员      | 易平  | 男  | 卫生管理学 | 副研究员  | 浙江大学医学院        |
| 委员      | 宋永新 | 男  | 法律学   | 教授    | 杭州紫金社区         |

秘 书：沈思奇

地 址：浙江大学医学院综合楼 603 室（浙江省杭州市余杭塘路 866 号 310058）

联系电话：0571-88208033

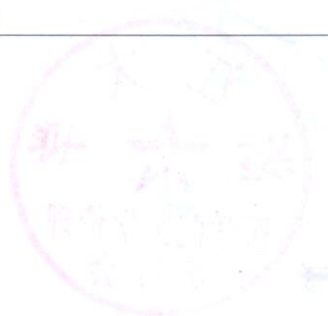

Supplement: 41423_2021_761_MOESM3_ESM.pdf [file 41423_2021_761_MOESM3_ESM.pdf]
