# Supplementary material
Source: PubMed Central journal article supplement (PMC8484279)
Supplement: 41423_2021_761_MOESM4_ESM.pdf [file 41423_2021_761_MOESM4_ESM.pdf]

# 浙江大学实验动物福利伦理审查委员会

## 动物实验项目审批件

ZJU-IACUC: ETHICAL APPROVAL FOR ANIMAL RESEARCH PROJECT

项目批准号 ETHICS CODE: **ZJU20210015**

有效期 PERIOD OF VALIDITY: **4 Years**

|                                                                                                                                                                                                                                                                                                                                                                                                                                                                             |                                                                                                                                                                                                                 |                                             |                                                |
|-----------------------------------------------------------------------------------------------------------------------------------------------------------------------------------------------------------------------------------------------------------------------------------------------------------------------------------------------------------------------------------------------------------------------------------------------------------------------------|-----------------------------------------------------------------------------------------------------------------------------------------------------------------------------------------------------------------|---------------------------------------------|------------------------------------------------|
| 项目名称<br>Title of Project                                                                                                                                                                                                                                                                                                                                                                                                                                                    | <b>Msn 家族激酶 MINK1 在 NLRP3 炎症小体活化及其相关炎症性疾病的调控功能与机制研究</b>                                                                                                                                                         |                                             |                                                |
| 申请单位<br>Organisation                                                                                                                                                                                                                                                                                                                                                                                                                                                        | 浙江大学基础医学院免疫所                                                                                                                                                                                                    | 项目负责人 Principal Investigator:<br><b>鲁林荣</b> |                                                |
| 合作单位<br>Co-organisation                                                                                                                                                                                                                                                                                                                                                                                                                                                     | <b>NA</b>                                                                                                                                                                                                       | 参与人 Participant(s):<br><b>朱凯翔</b>           |                                                |
| 报送材料<br>Materials                                                                                                                                                                                                                                                                                                                                                                                                                                                           | <input checked="" type="checkbox"/> 伦理审查申请表 (No. 19262) Ethical Review Form <input type="checkbox"/> 课题申报书 Project Declaration <input type="checkbox"/> 其它 Other _____                                          |                                             |                                                |
| 所用动物<br>Animals to be used                                                                                                                                                                                                                                                                                                                                                                                                                                                  | 品种 Species<br>小鼠                                                                                                                                                                                                | 品系 Strain<br>C57BL/6                        | 级别 Grade<br>SPF      数量 Quantity<br><b>300</b> |
| 投票结果<br>Voting Results                                                                                                                                                                                                                                                                                                                                                                                                                                                      | 参会 Attendance: <u>15</u> 同意 Agreed: <u>15</u><br>不同意 Disagreed: <u>0</u> 弃权 Waiver: <u>0</u><br>* 是否启动紧急程序 If the urgency process used: <input type="checkbox"/> 是 Yes <input checked="" type="checkbox"/> 否 No |                                             |                                                |
| 审查结果<br>Result of Ethical Review                                                                                                                                                                                                                                                                                                                                                                                                                                            | <input checked="" type="checkbox"/> 批准 Approved<br><input type="checkbox"/> 附条件批准 Conditionally Approved<br><input type="checkbox"/> 否决 (项目终止或暂停) Disapproved (Suspension or Termination)                       |                                             |                                                |
| <b>评审意见 Comments:</b><br>经本委员会审核, 同意申请表中相关实验动物福利伦理的项目。请项目负责人按照自己的承诺开展本次实验, 保证在整个项目实施过程中全部都遵守相关的福利伦理规定。After the ethical review by the committee members, the protocol of research project has been approved to be performed. The research project should be carried out in accordance with the approved protocol and complied with the principles of animal welfare and ethics; the researchers have committed to guarantee the animal welfare during the whole procedures. |                                                                                                                                                                                                                 |                                             |                                                |
| 主任委员 (签名) Committee Chair (Signature): 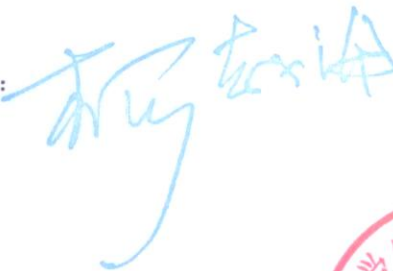                                                                                                                                                                                                                                                                                                                                                 |                                                                                                                                                                                                                 |                                             |                                                |
| 日期 Date: 2021-01-31                                                                                                                                                                                                                                                                                                                                                                                                                                                         |                                                                                                                                                                                                                 |                                             |                                                |
| 浙江大学实验动物福利伦理审查委员会<br>Laboratory Animal Welfare and Ethics Committee of Zhejiang University                                                                                                                                                                                                                                                                                                                                                                                  |                                                                                                                                                                                                                 |                                             |                                                |
