# Supplementary material
Source: PubMed Central journal article supplement (PMC8484279)
Supplement: 41423_2021_761_MOESM5_ESM.pdf [file 41423_2021_761_MOESM5_ESM.pdf]

Fig. 1A

Thermo Scientific™, PageRuler™ Prestained Protein Ladder, 10 to 180 kDa was used as a marker for protein size.

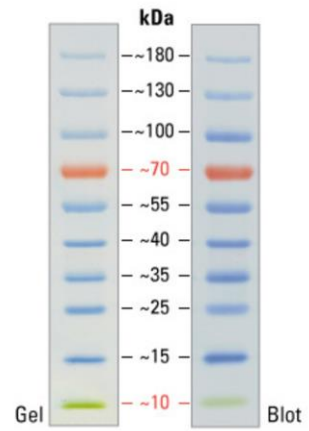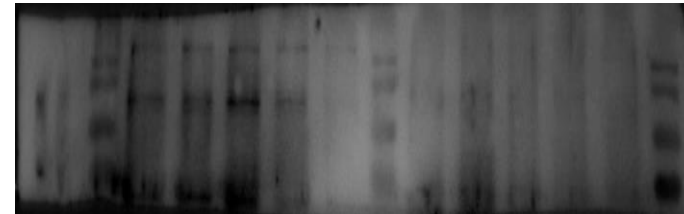

MINK1

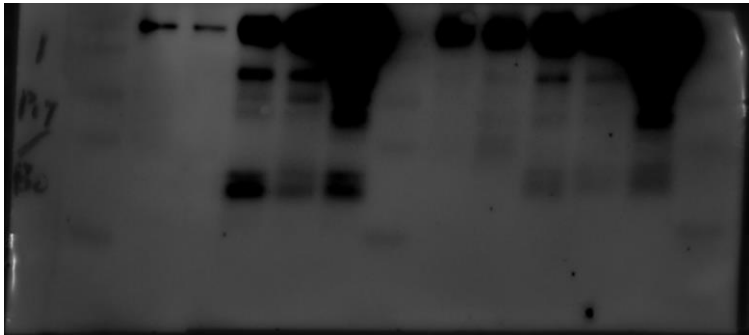

Caspase 1 p20

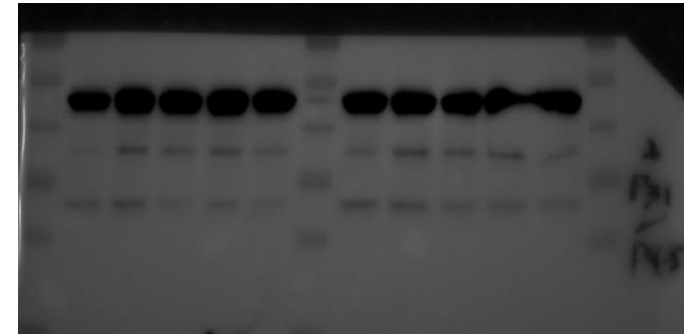

pro-Caspase 1 p45

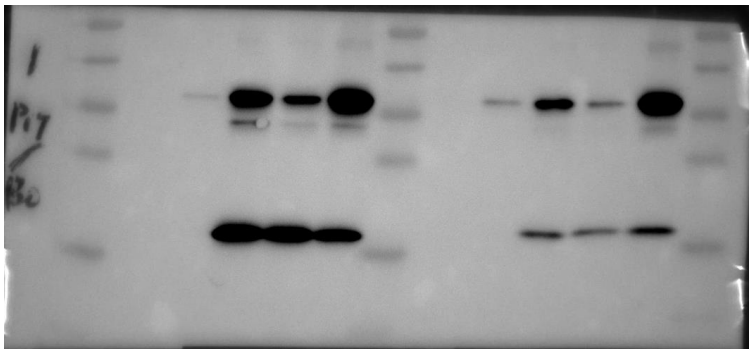

IL-1β p17

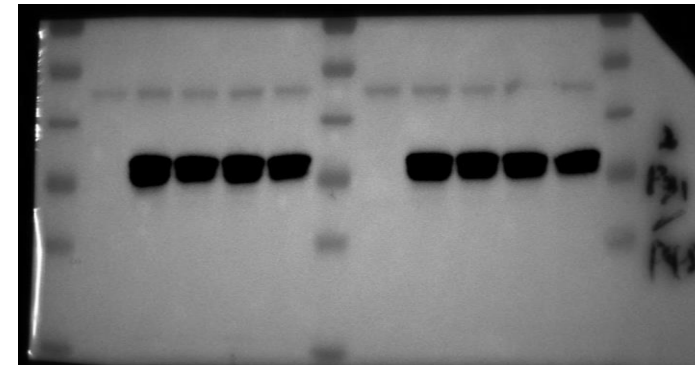

pro-IL-1β p31

Fig. 1C

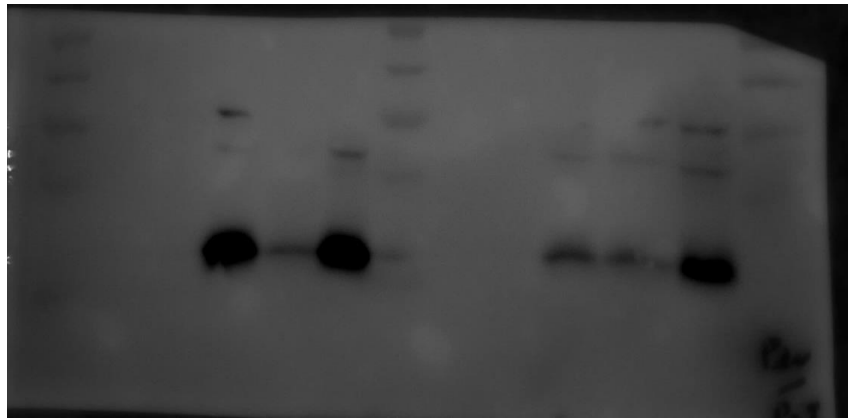

IL-1 $\beta$  p17

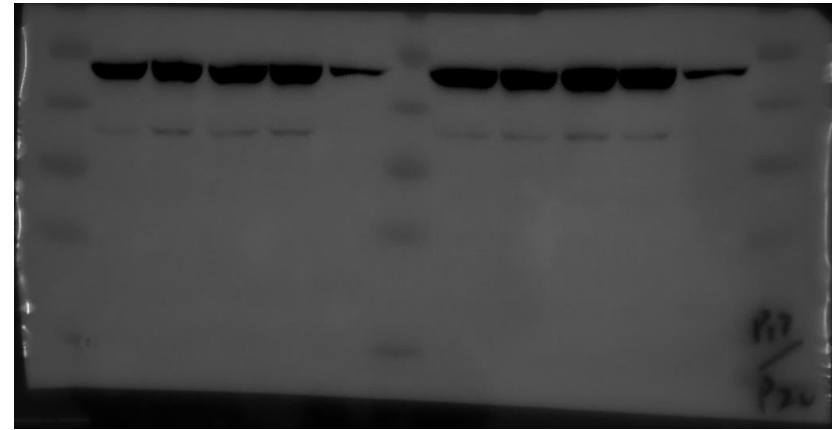

pro-Caspase 1 p45

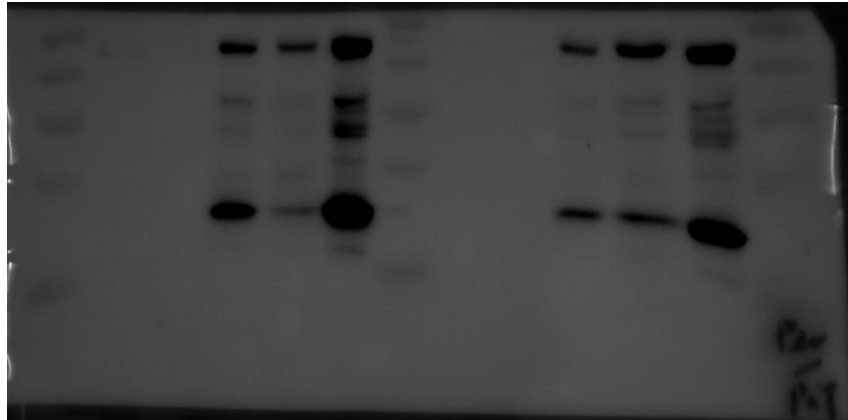

Caspase 1 p20

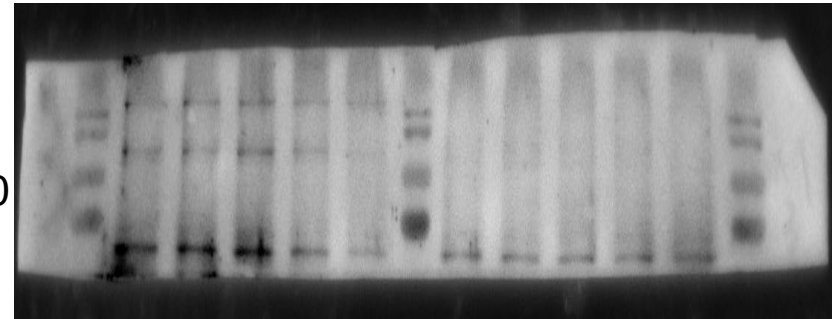

MINK1

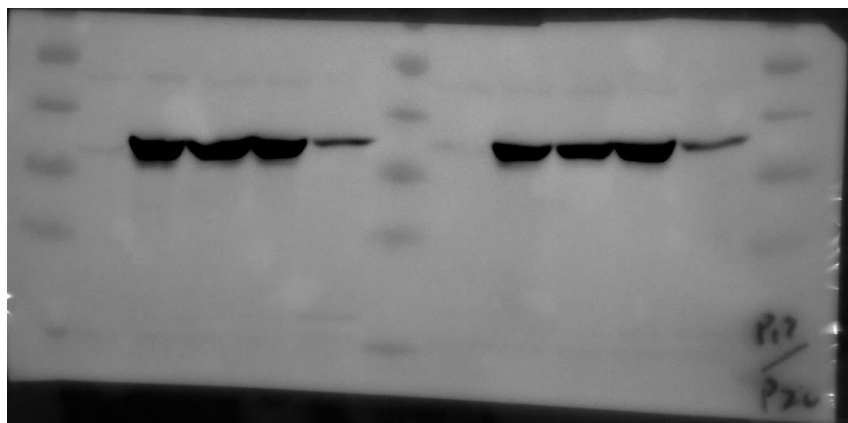

pro-IL-1 $\beta$  p31

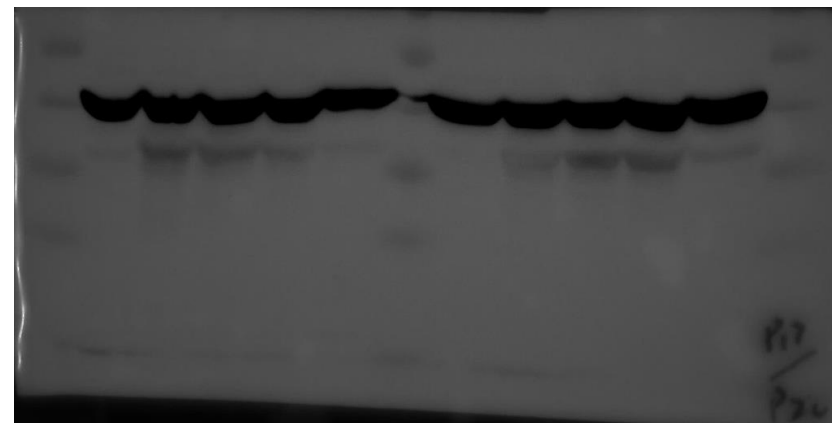

$\beta$ -Actin

Fig. 1E

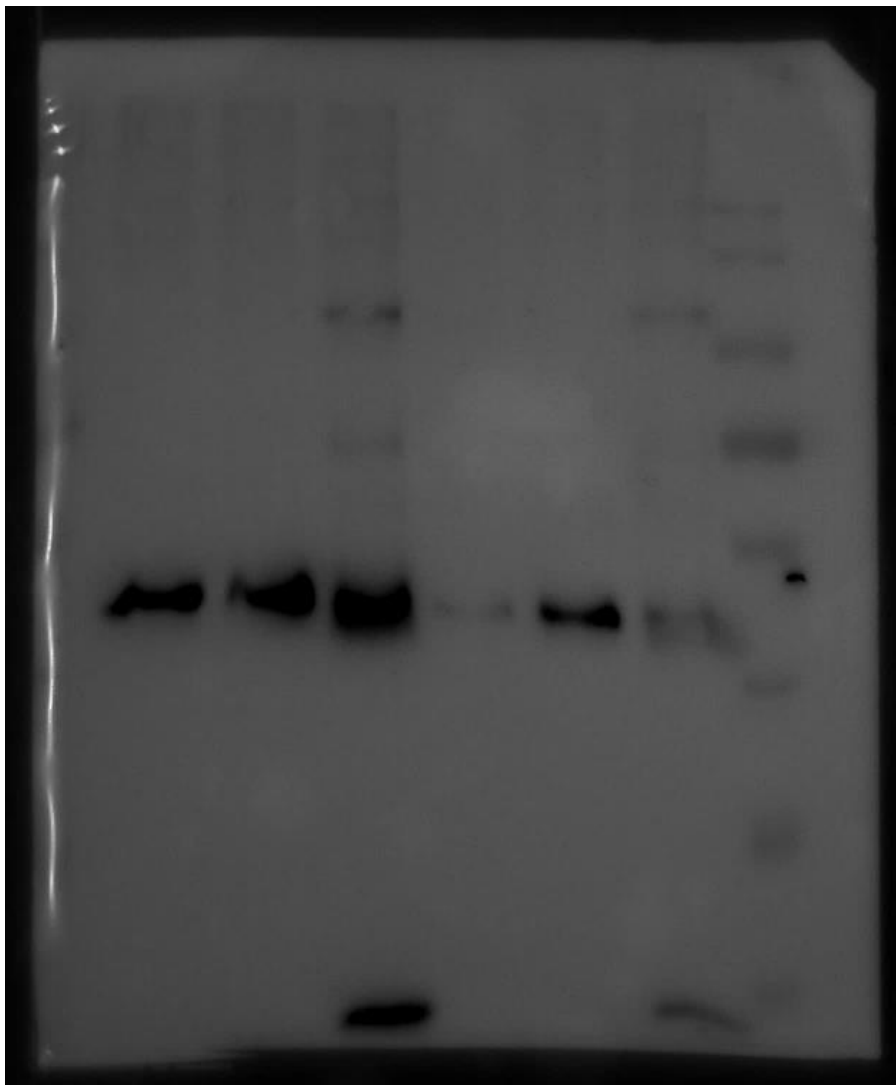

IB: ASC

◀ tetramer  
◀ trimer  
◀ dimer  
◀ monomer

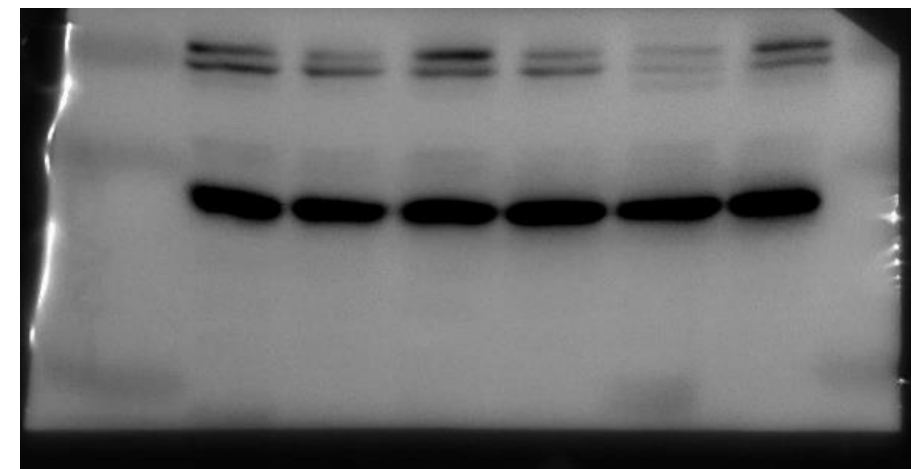

IB: ASC

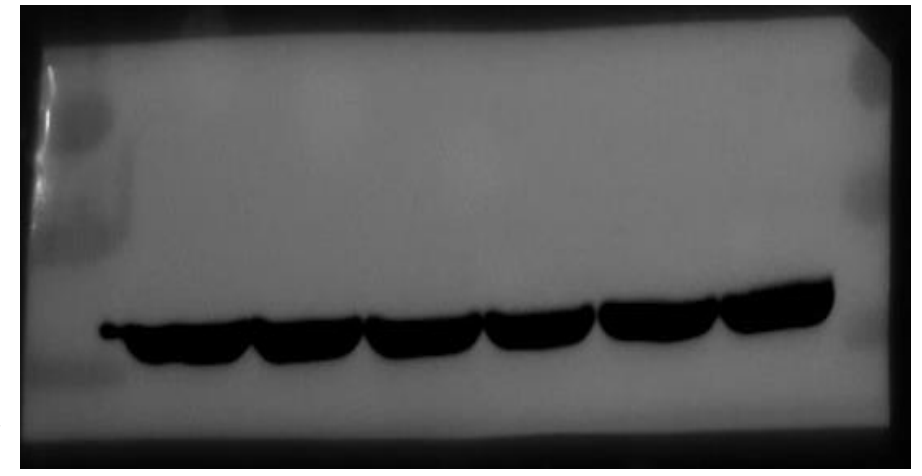

IB:  $\beta$ -Actin

Fig. 3B

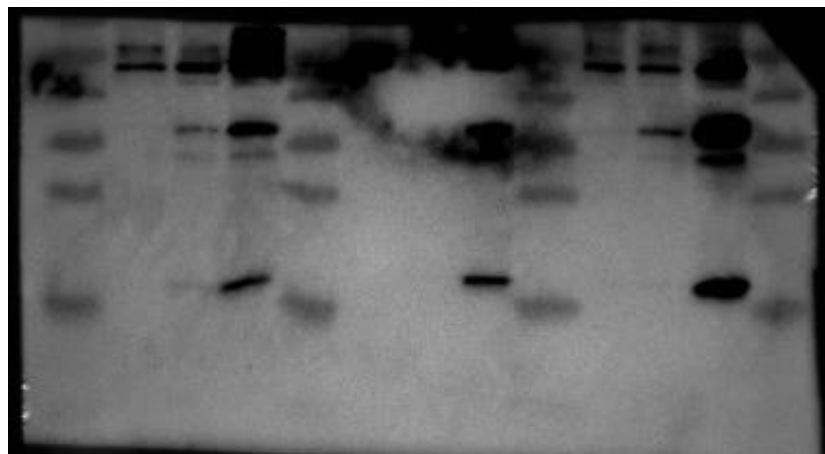

IL-1 $\beta$  p17

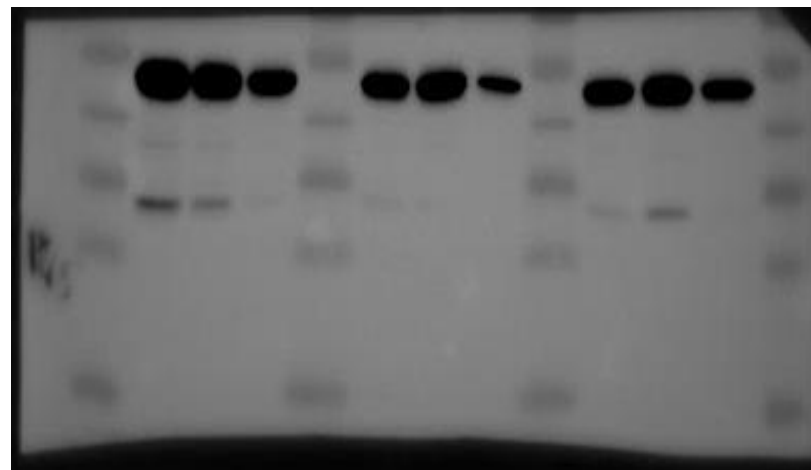

pro-Caspase1 p45

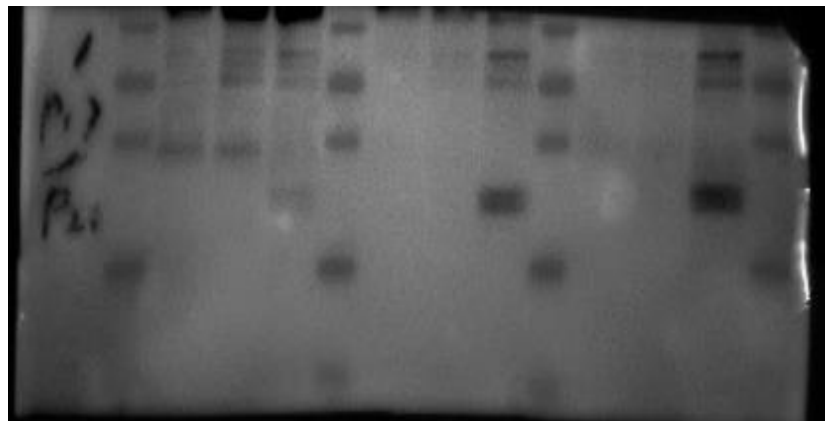

Caspase1 p20

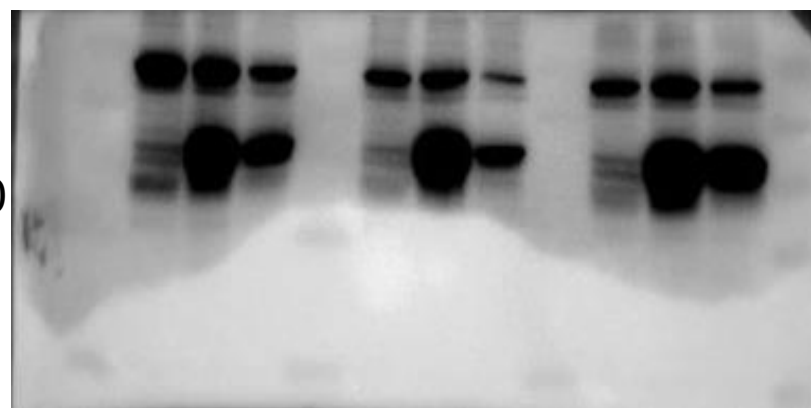

$\beta$ -Actin

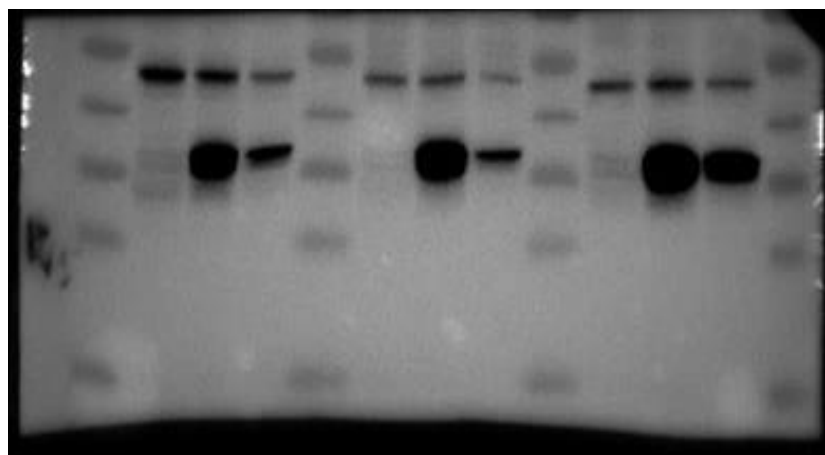

pro-IL-1 $\beta$  p31

Fig. 3E

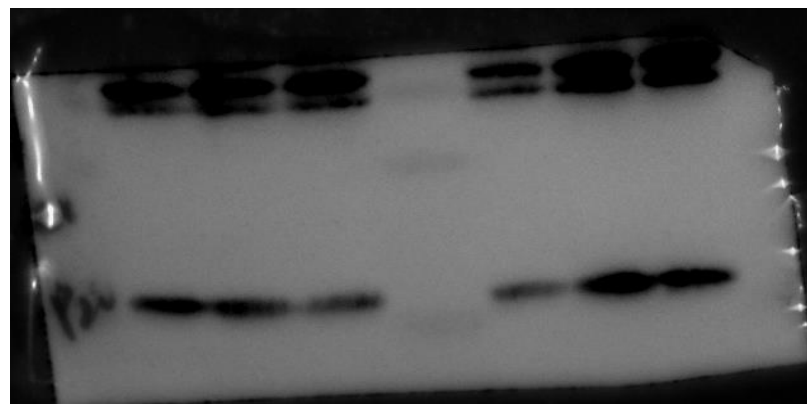

P20

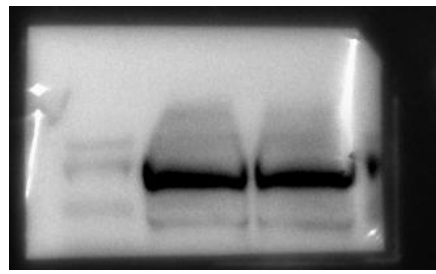

NLRP3

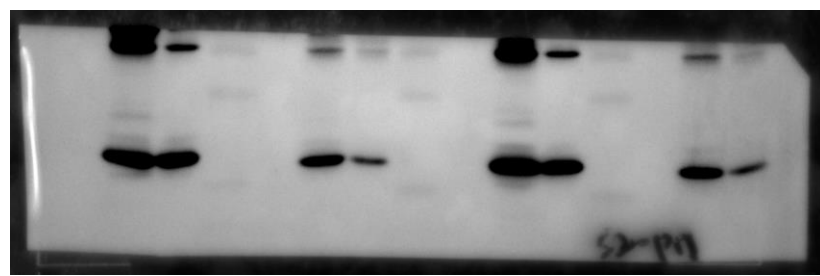

P17

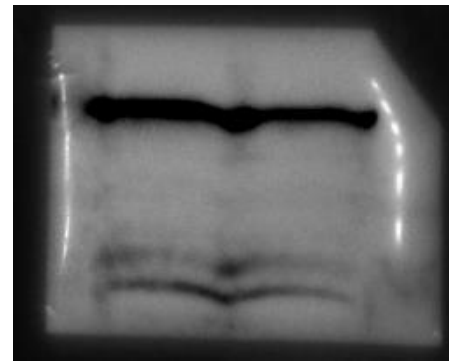

P45

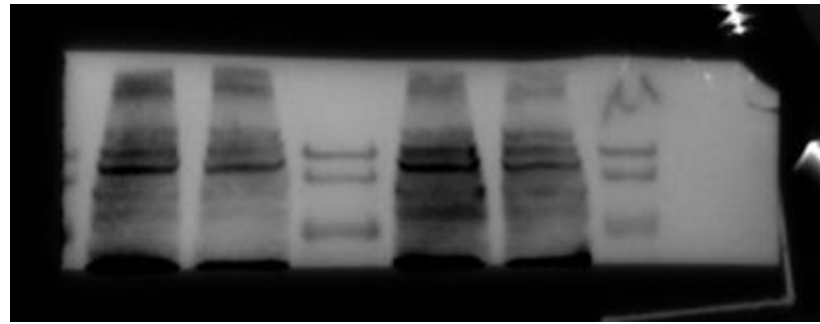

MINK1

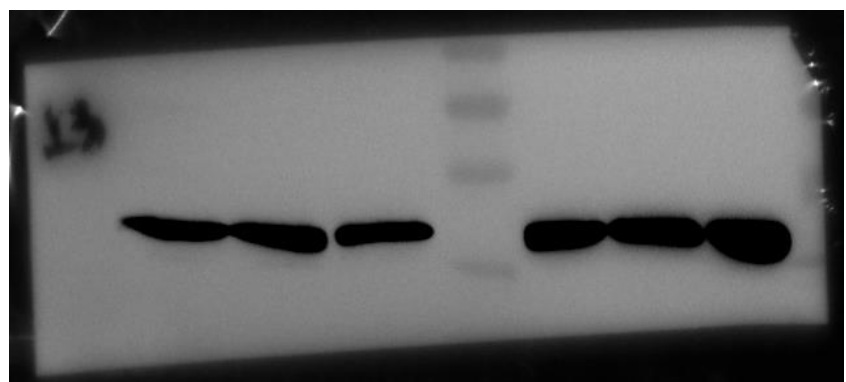

Actin

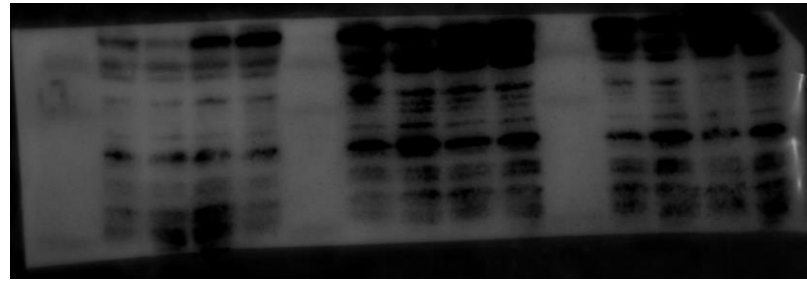

P31

Fig. S3G

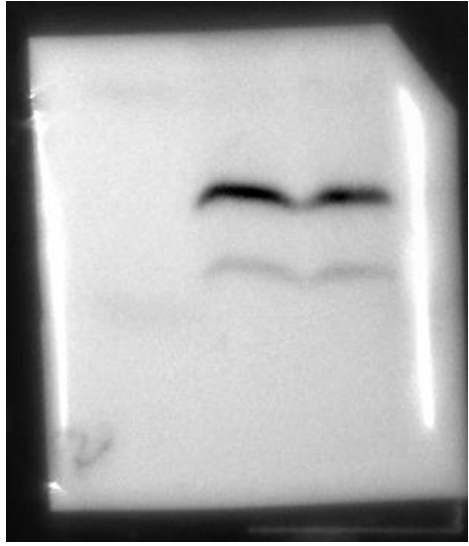

Caspase1 p20

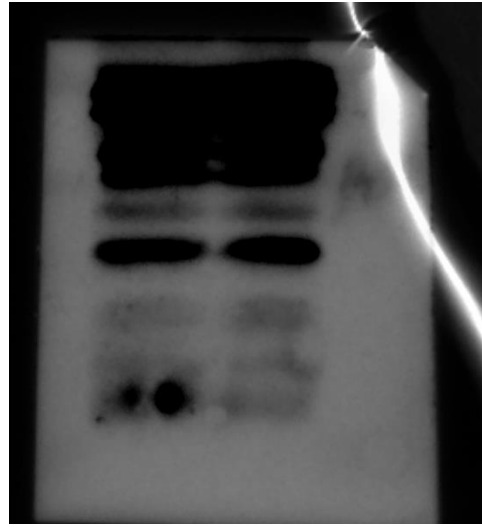

ASC

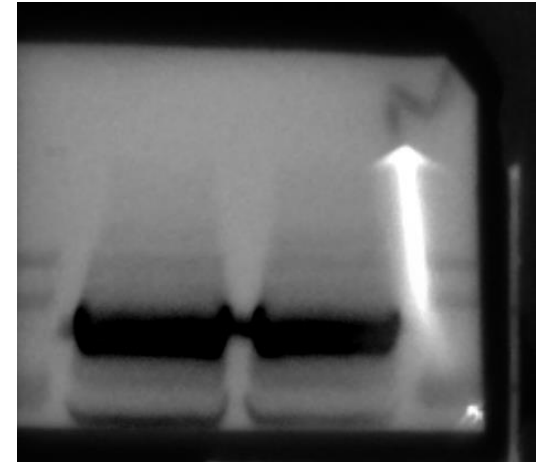

NLRP3

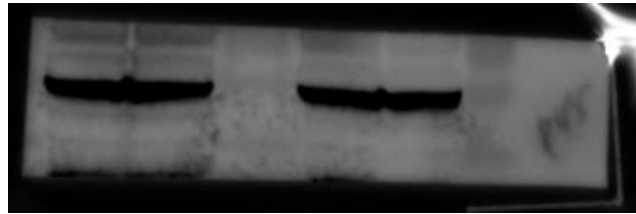

pro-Caspase1 p45

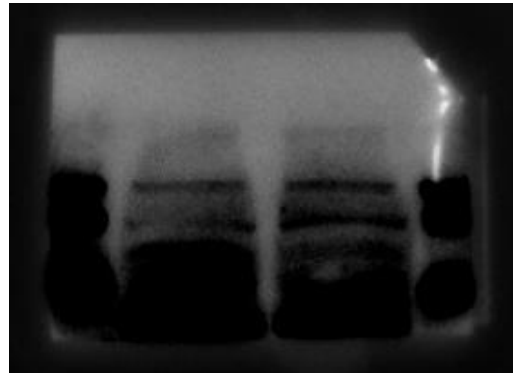

MINK1

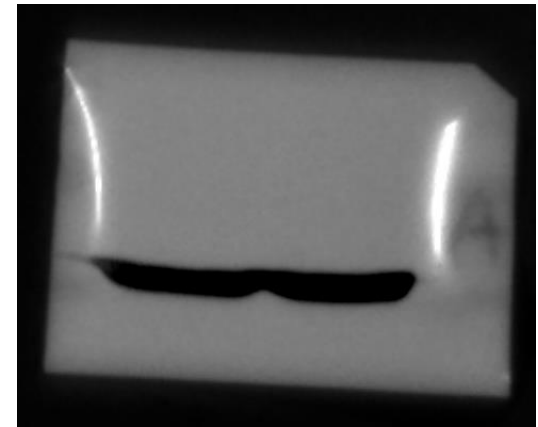

Actin

Fig. 3G

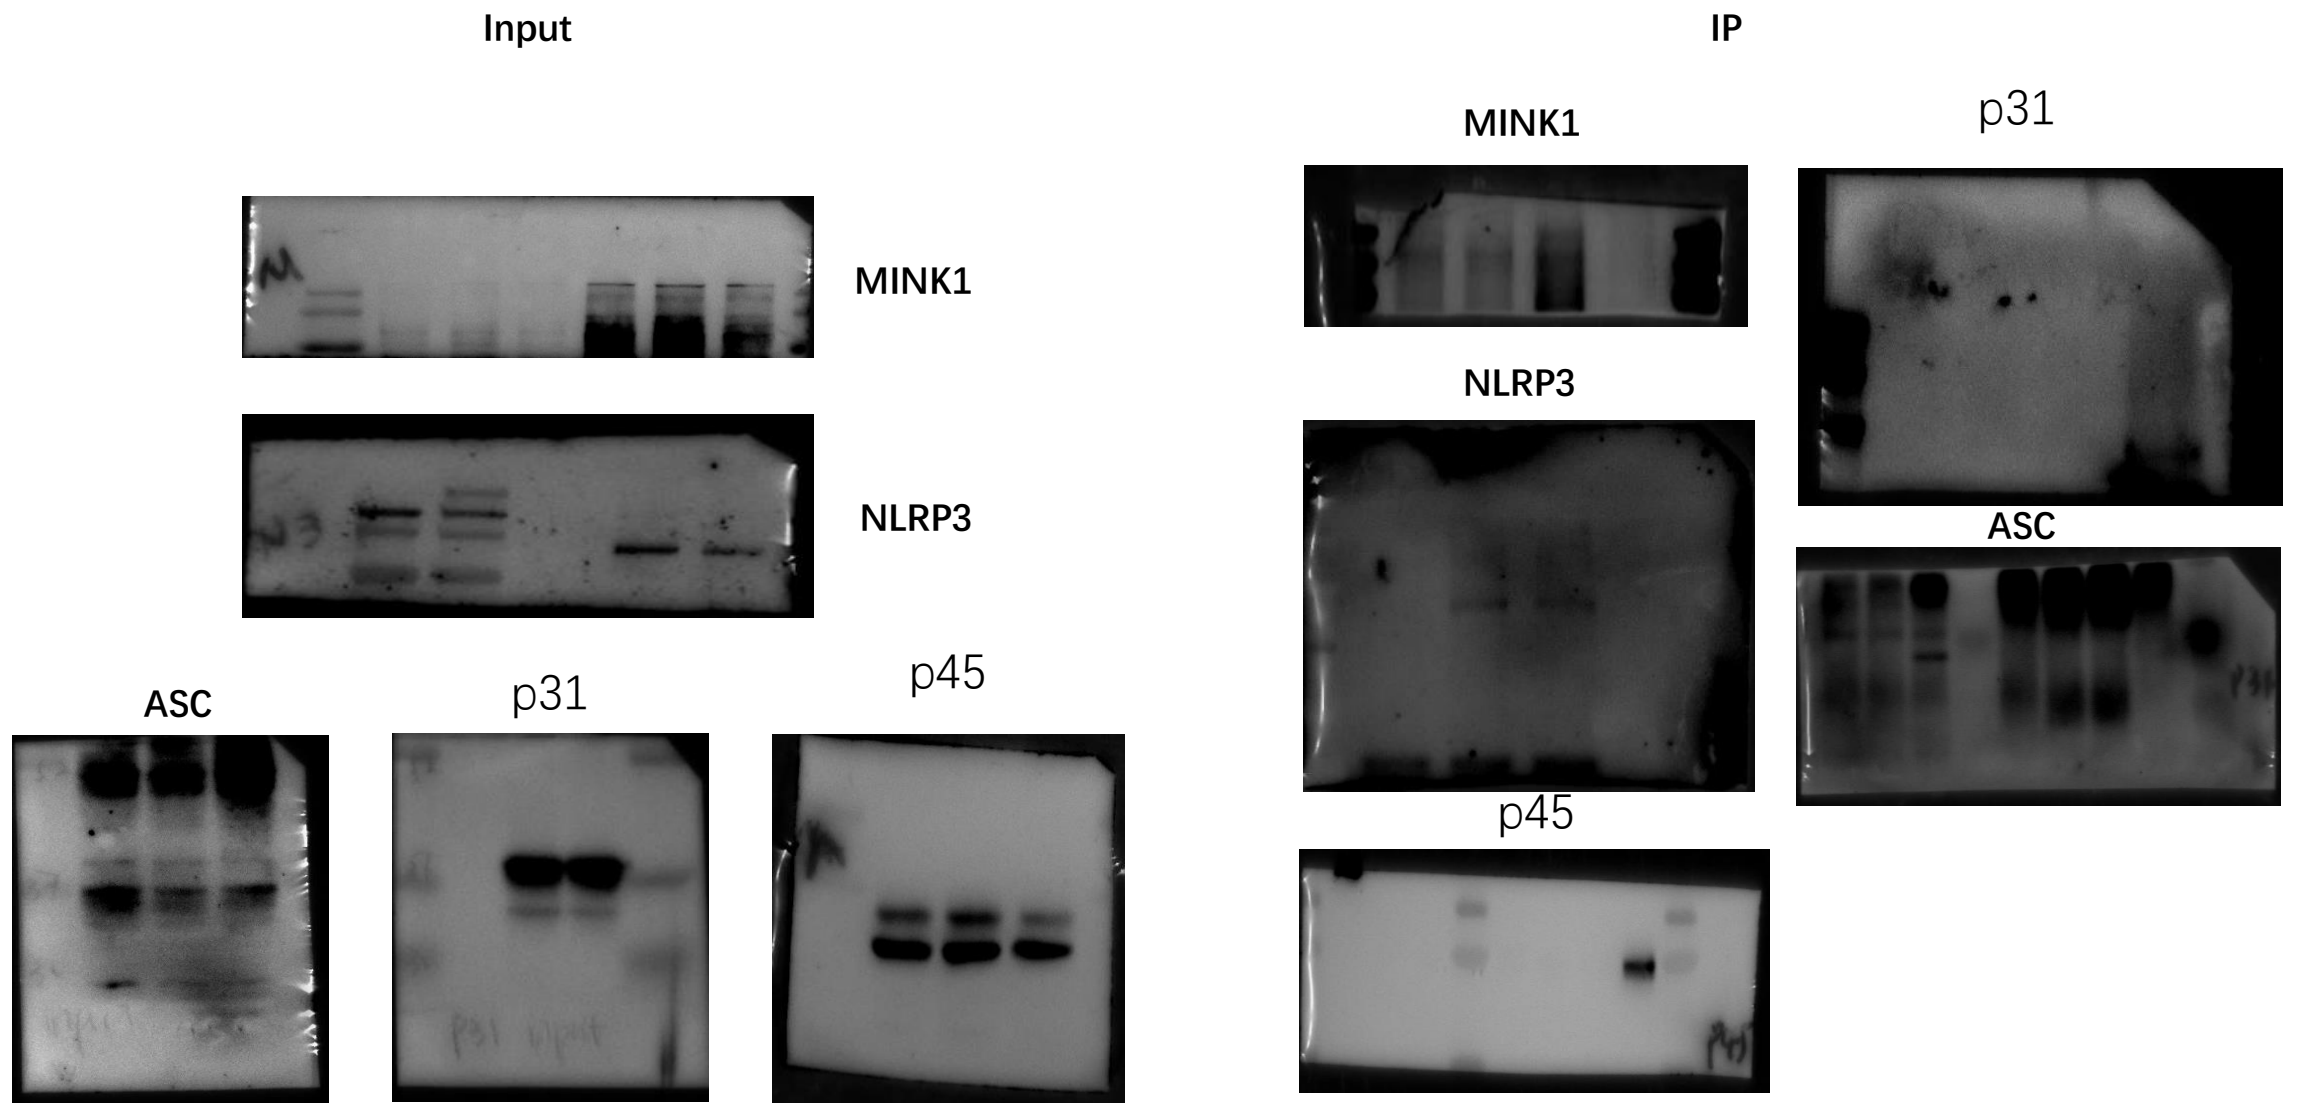

Fig. 3I

Input

Ip

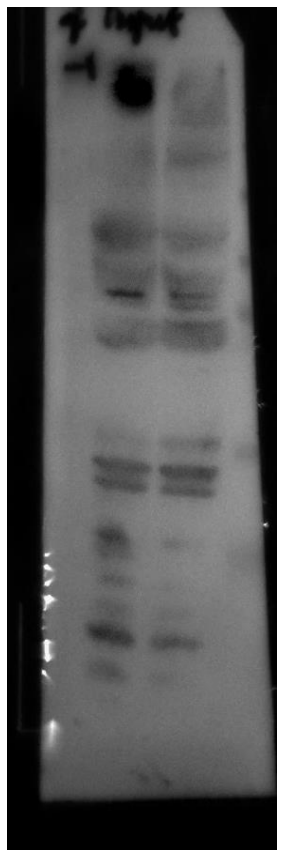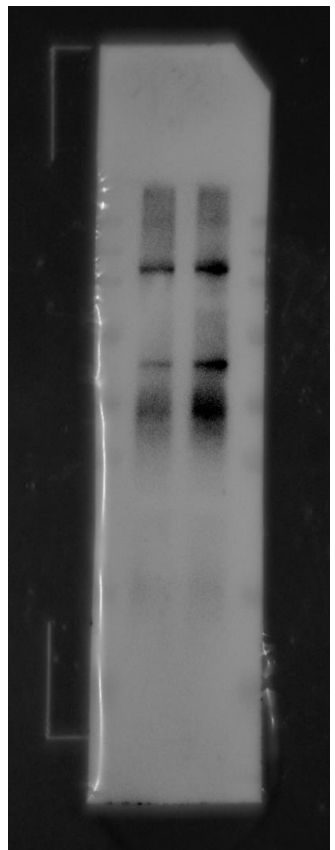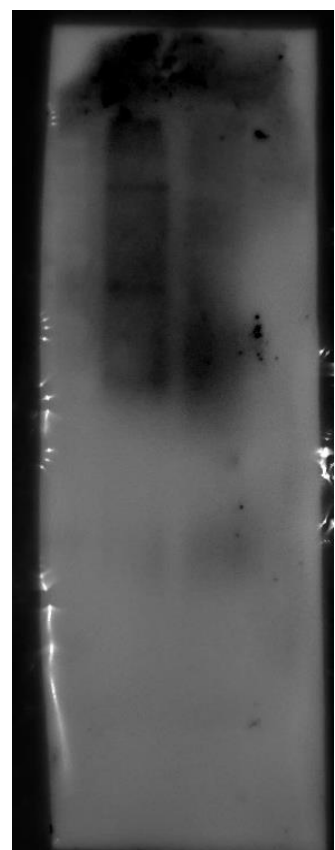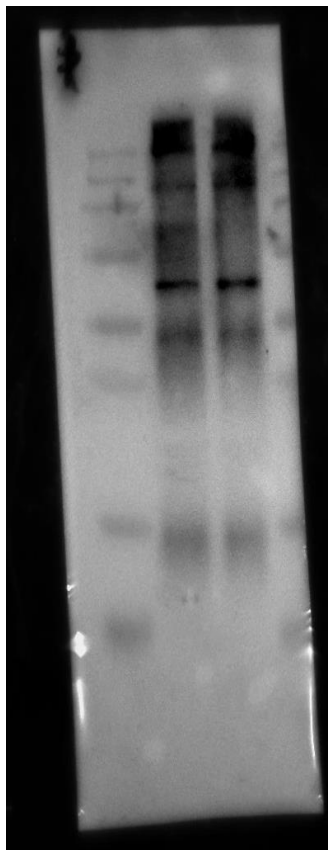

MINK1-FLAG

NLRP3-HA

MINK1-FLAG

NLRP3-HA



Fig. 3J

Input

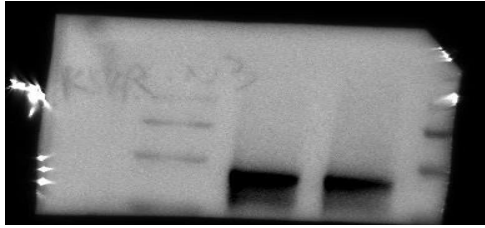

NLRP3-FLAG

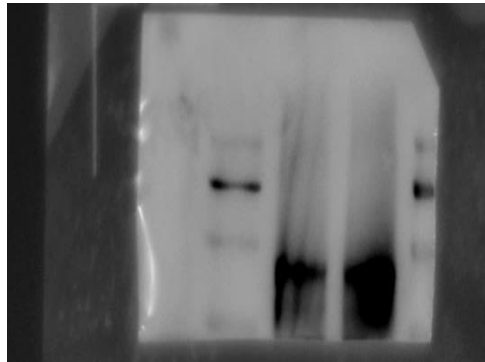

MINK1 HA

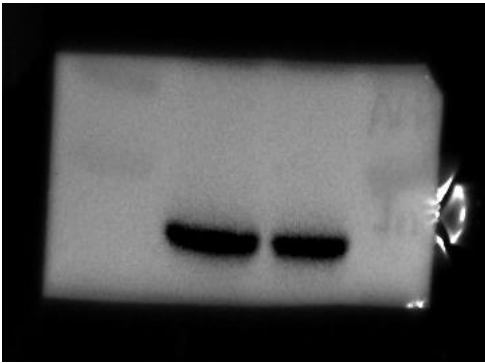

Actin

IP

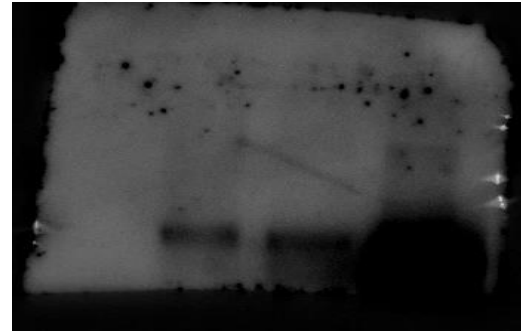

NLRP3 FLAG

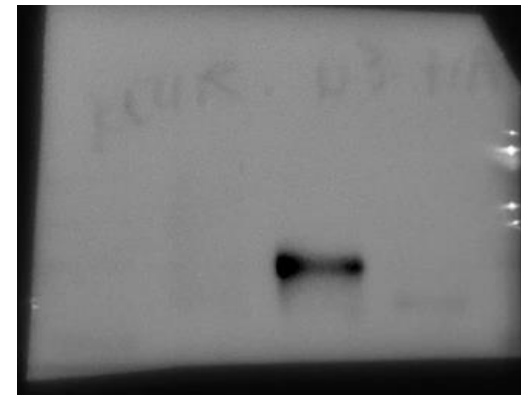

MINK1 HA

Fig. 3K

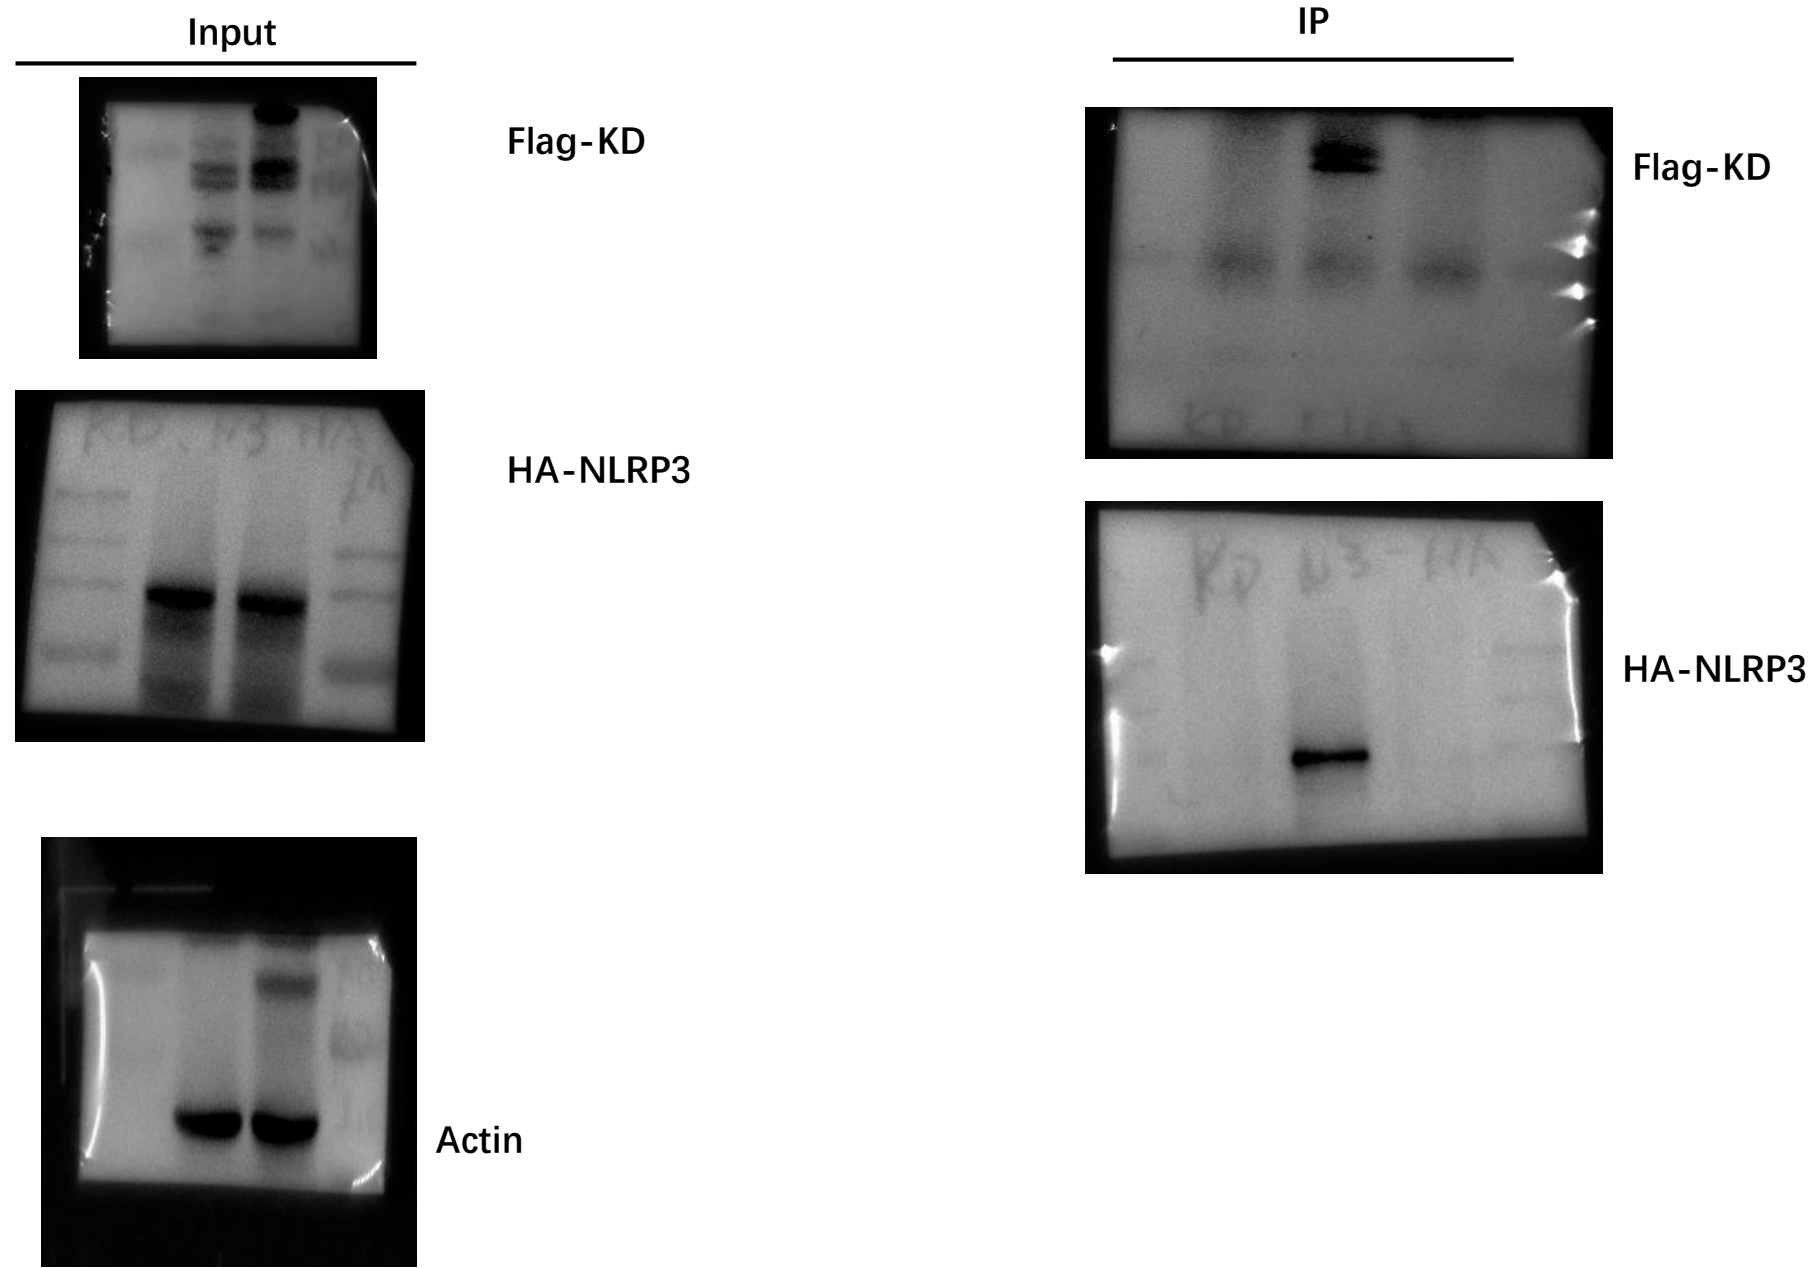

Fig. 3L

Input

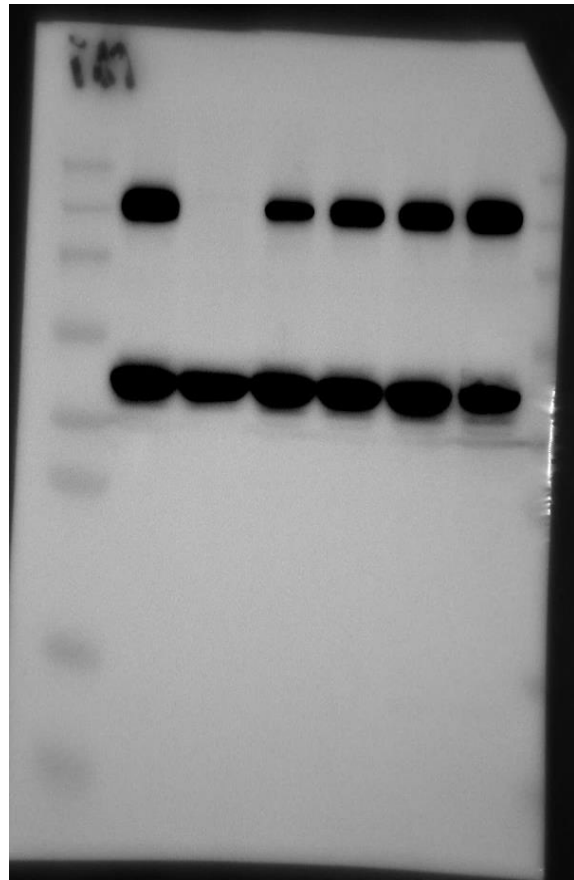

HA-MINK1

IP

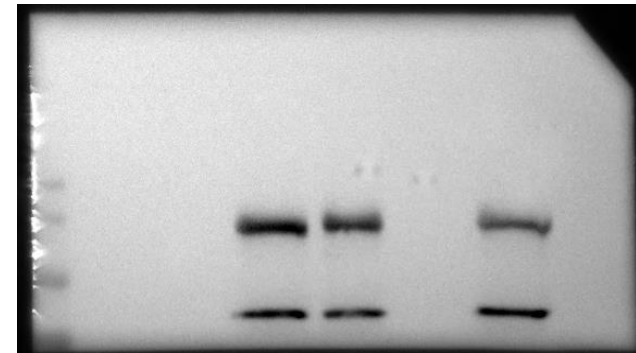

HA-MINK1

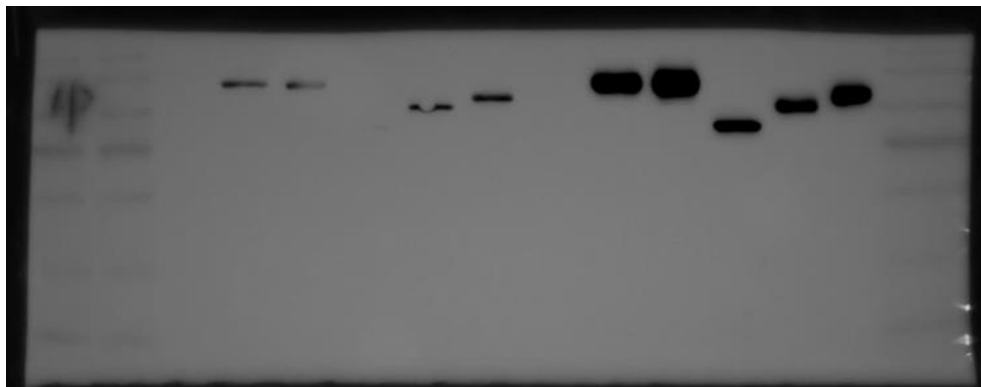

Flag-NLRP3

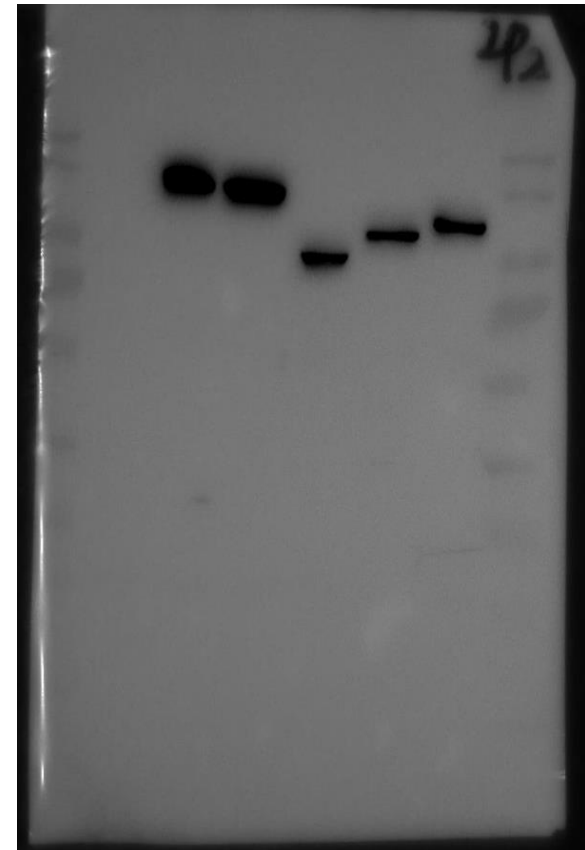

Flag-NLRP3

Fig. S3A

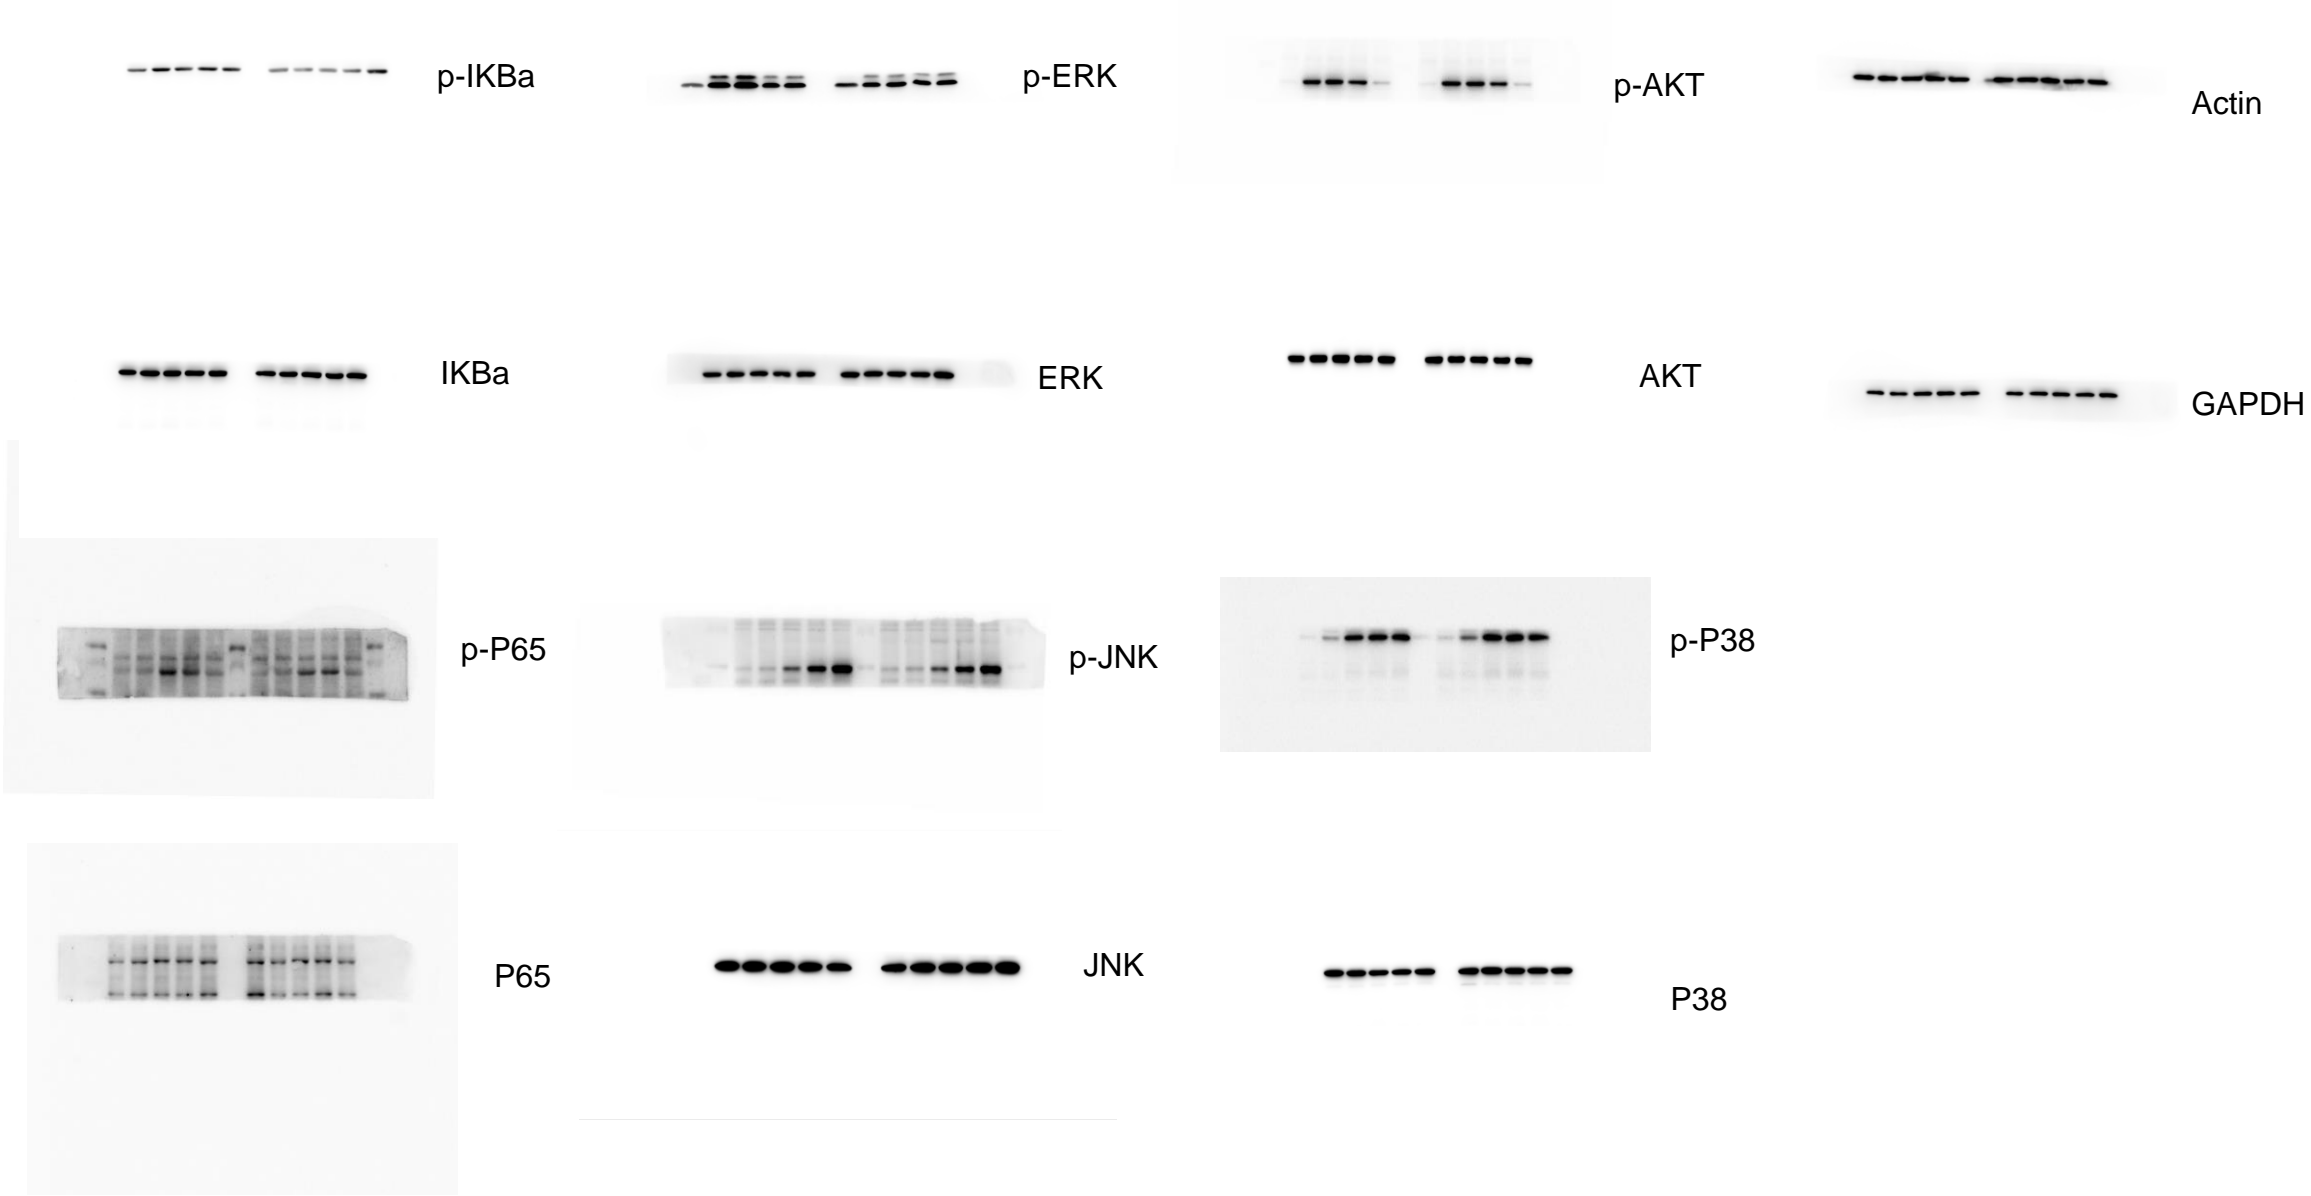

Fig. S3D

IP: p45  
IB: MINK1

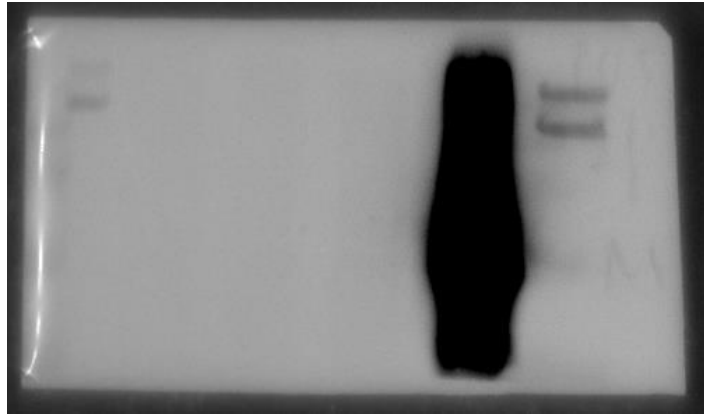

MINK1

Input

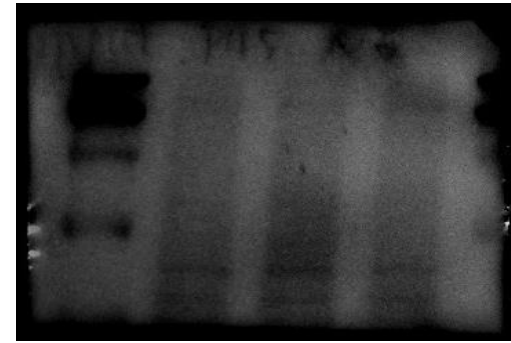

MINK1

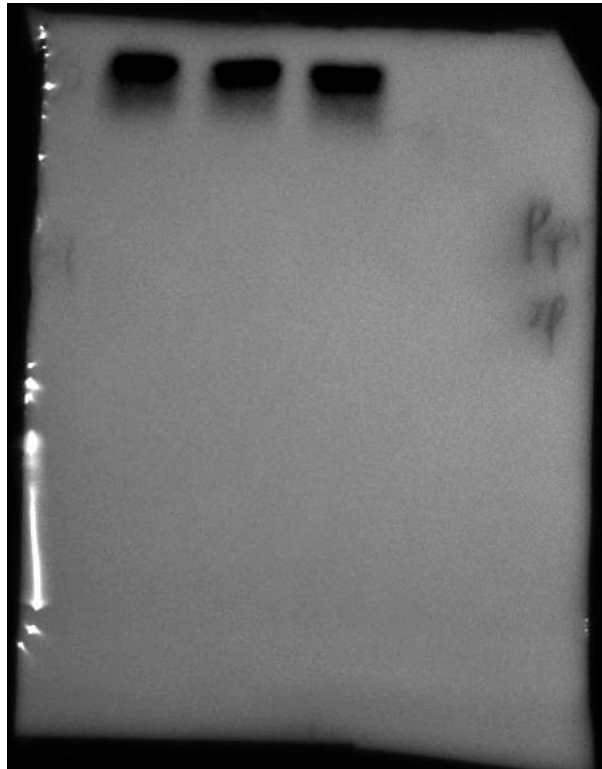

P45

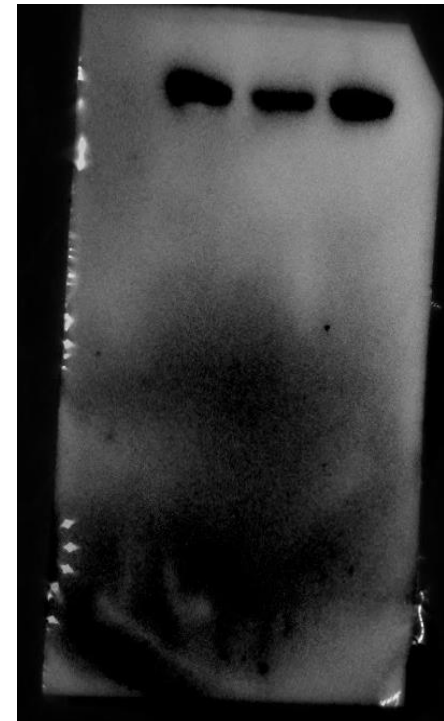

P45

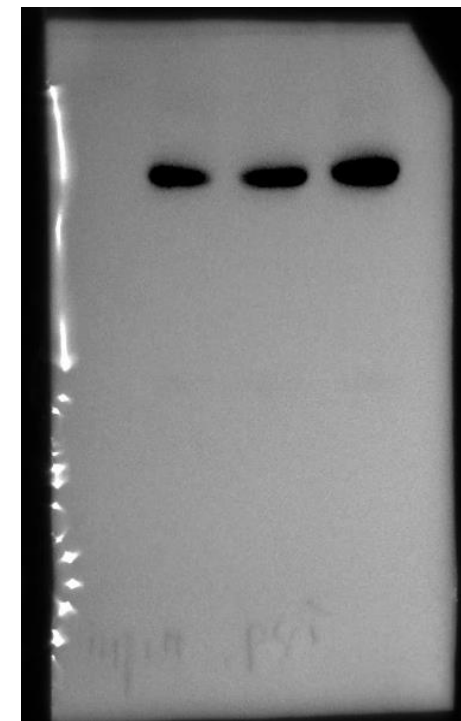

Actin

Fig. S3E

Input

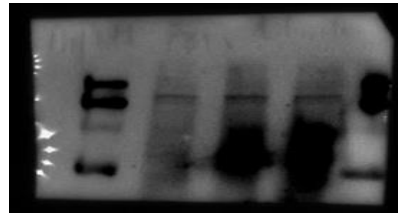

MINK1

IP

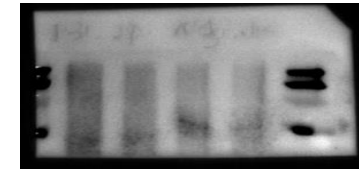

MINK1

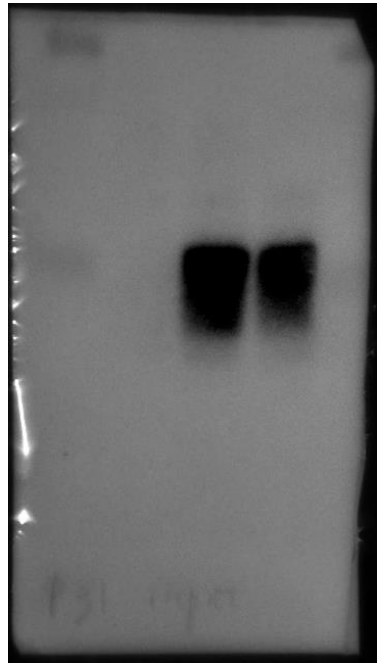

pro-IL-1β p31

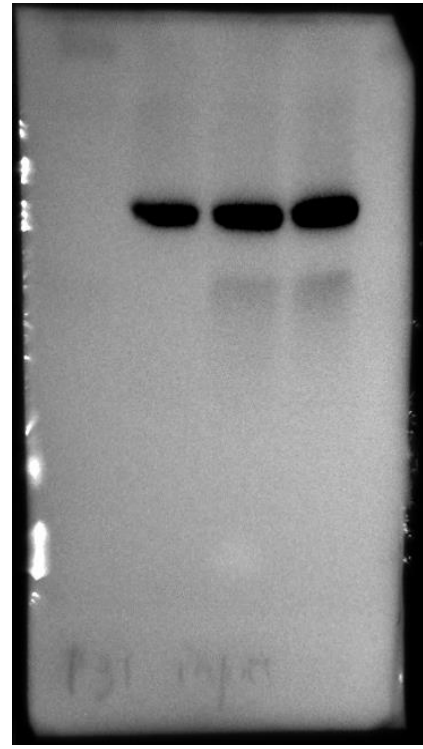

Actin

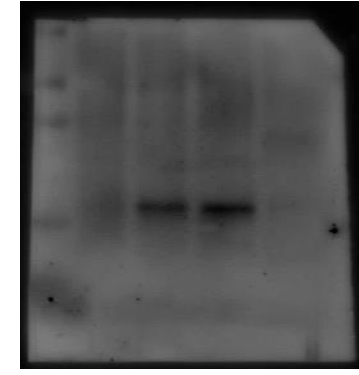

pro-IL-1β p31

Fig. S3F

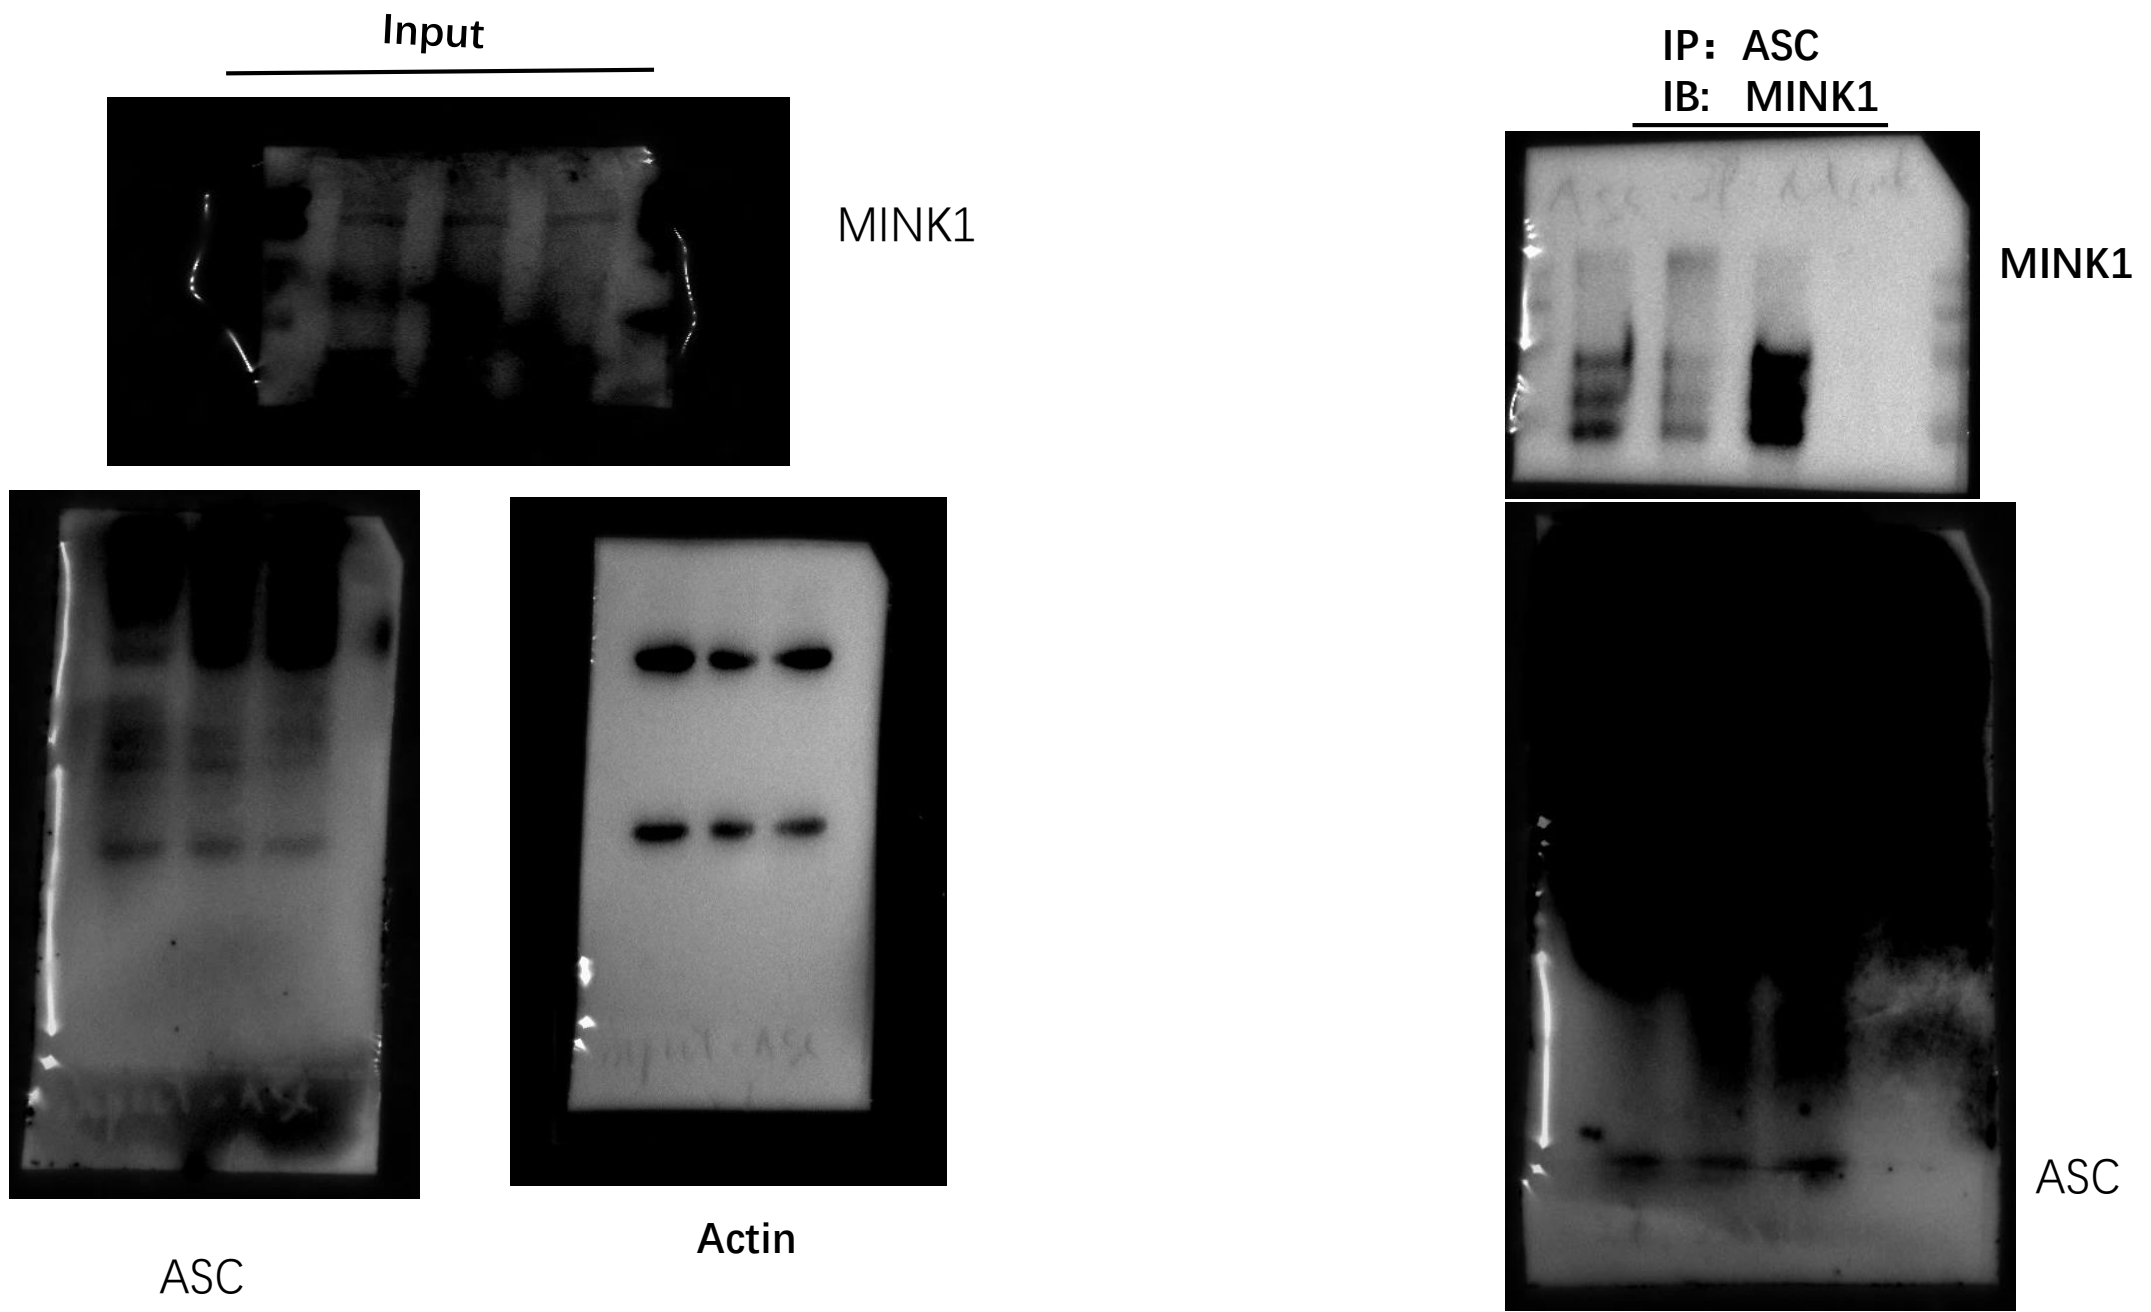

Fig. S3G

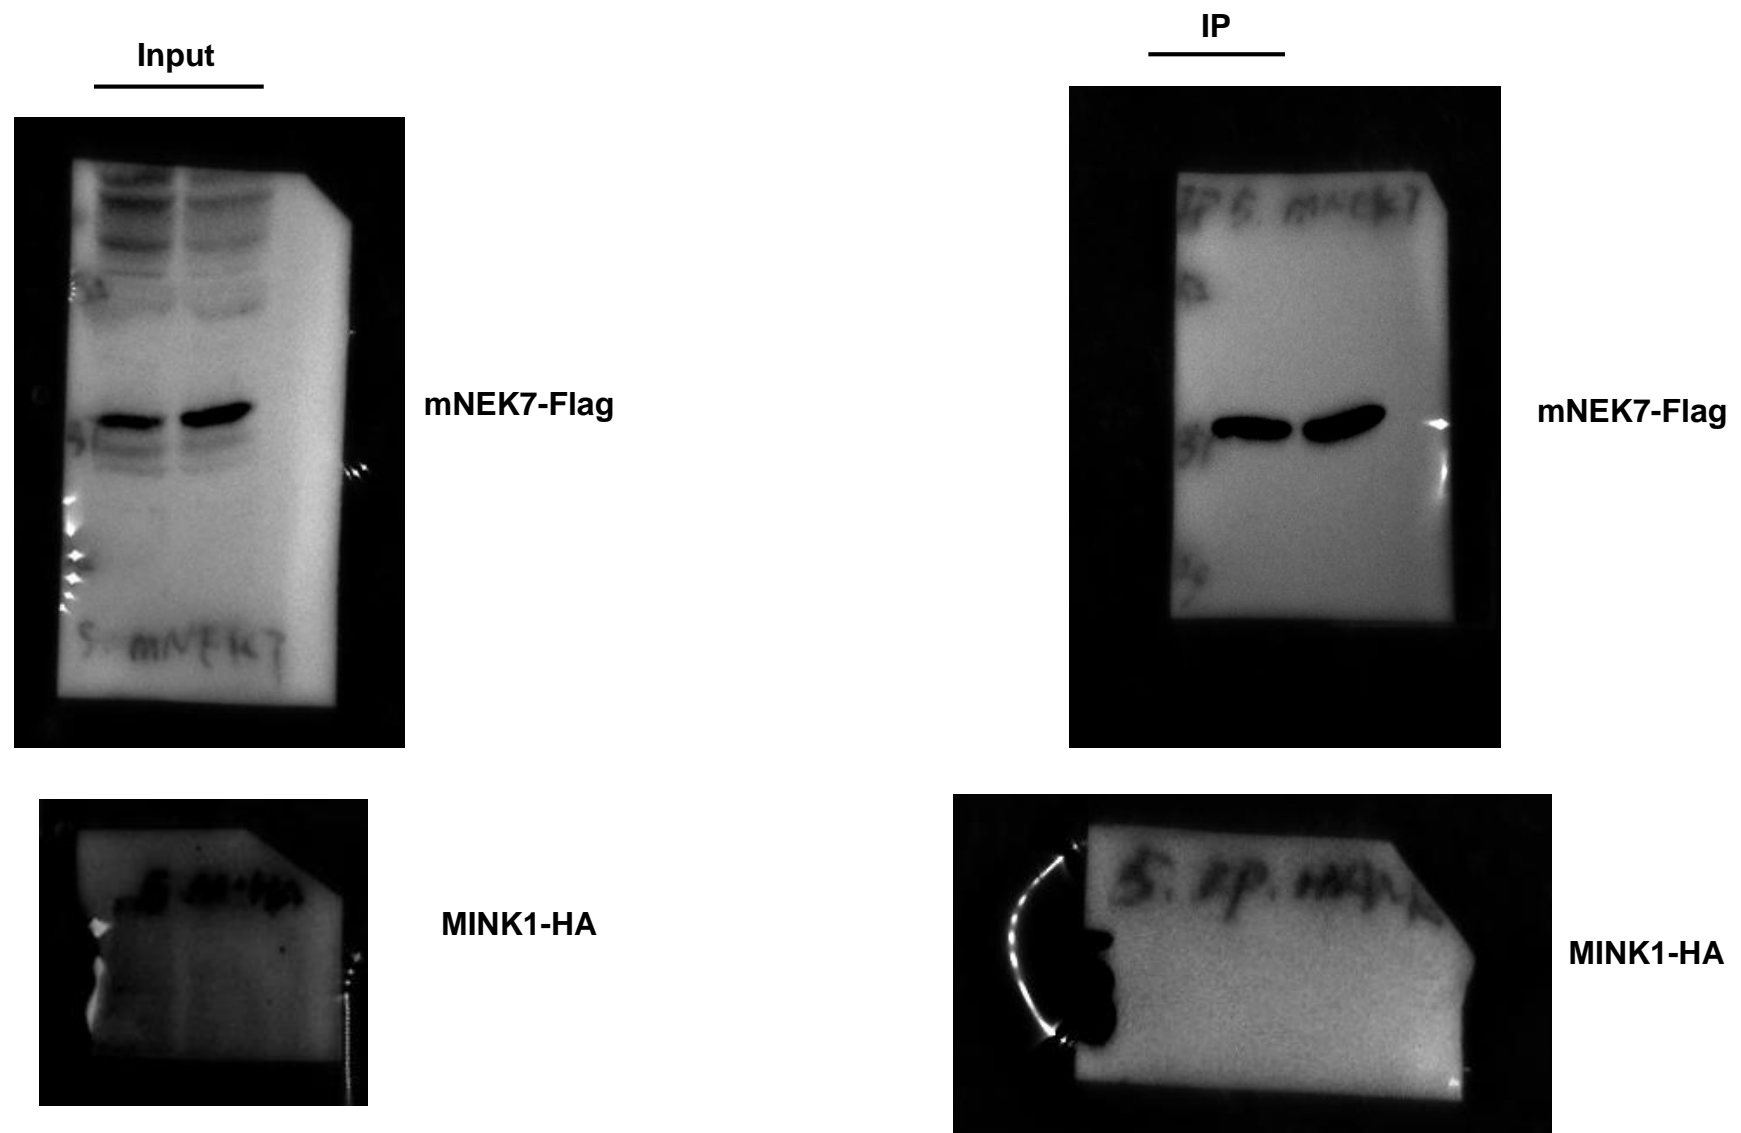



Fig. 4A

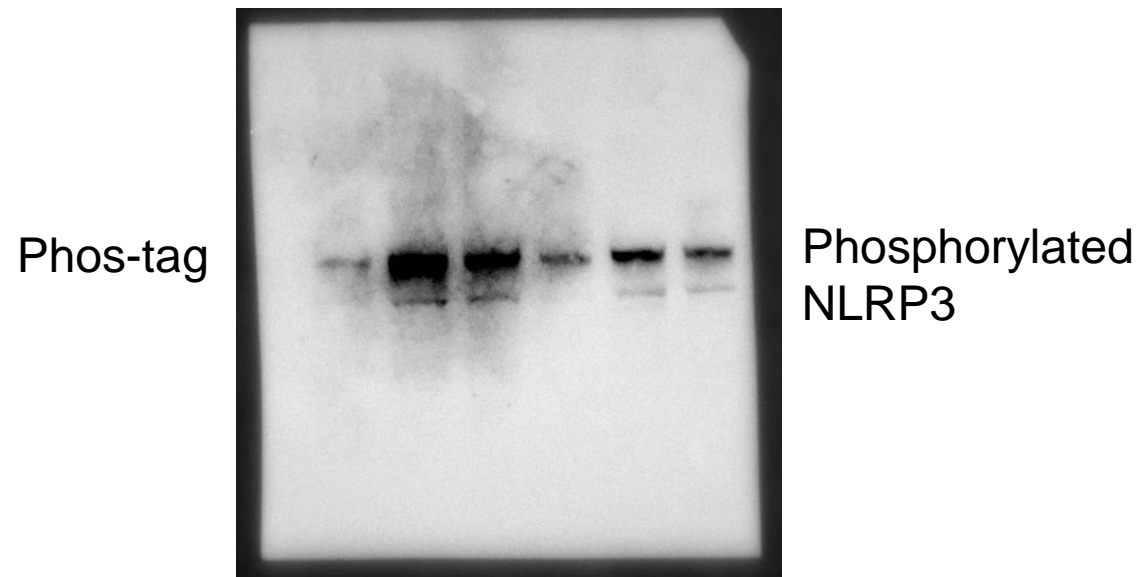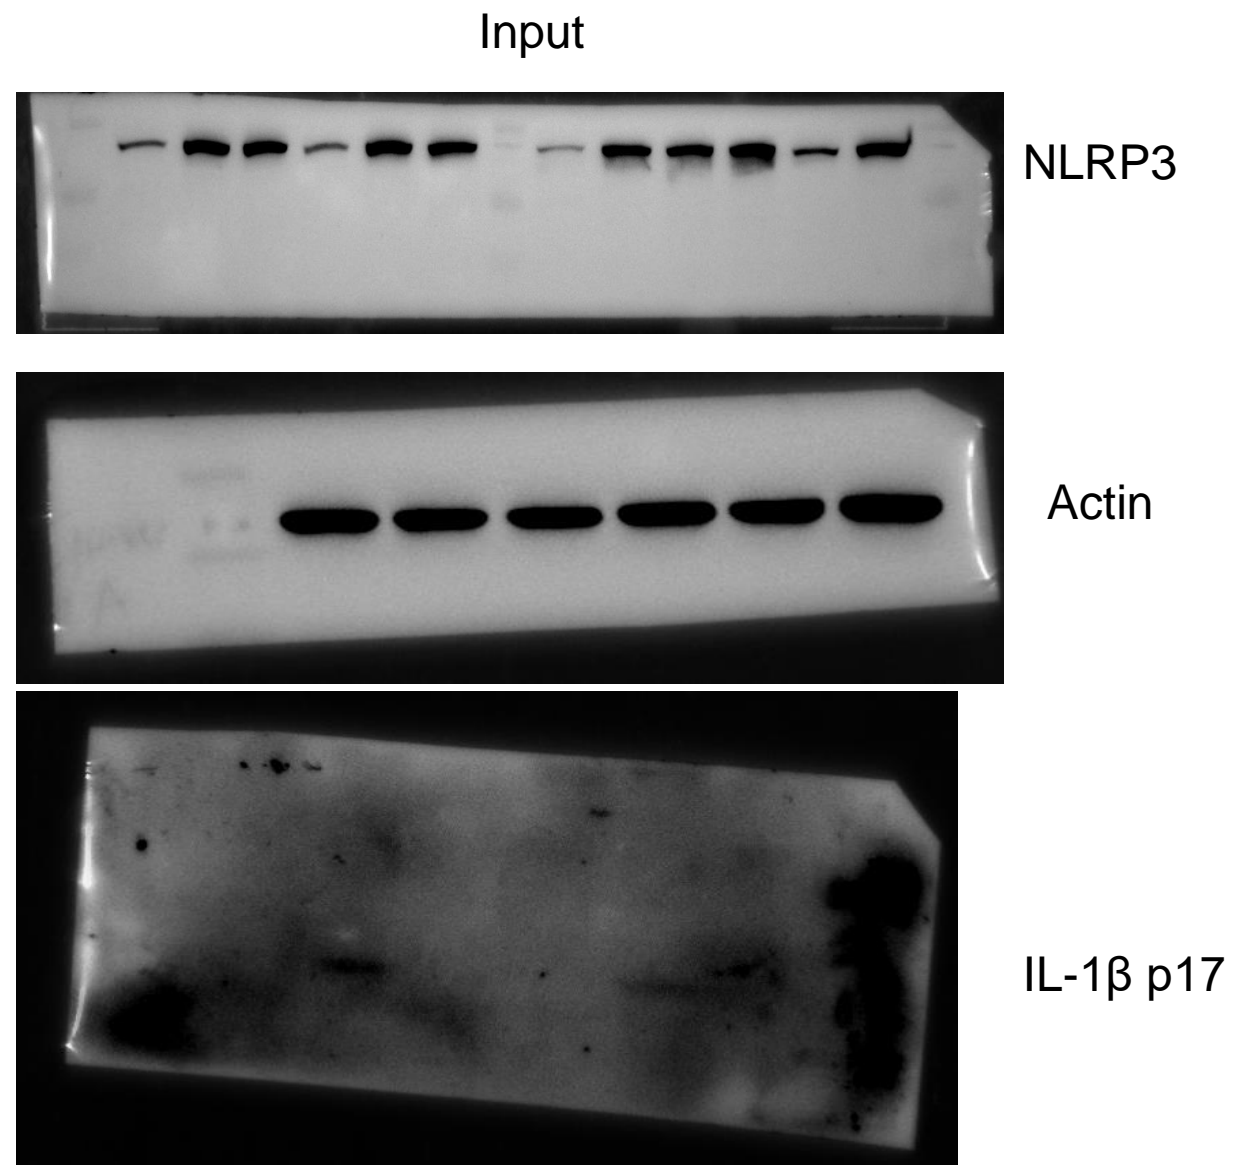

Fig. 4C

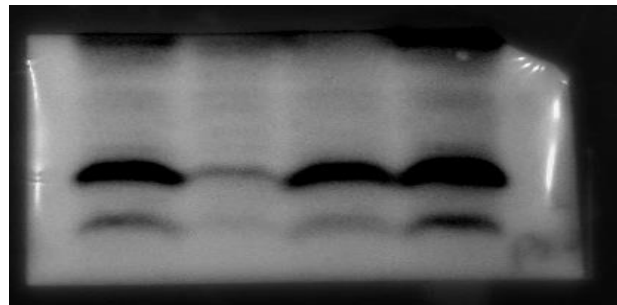

Casp 1 p20

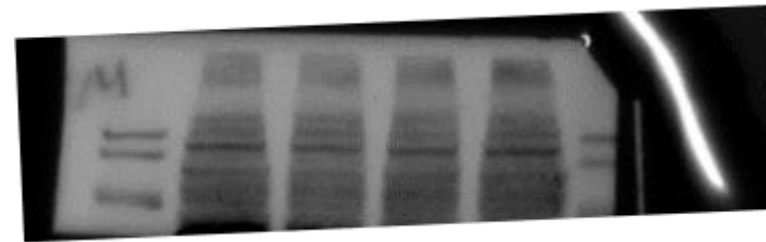

HA-MINK1

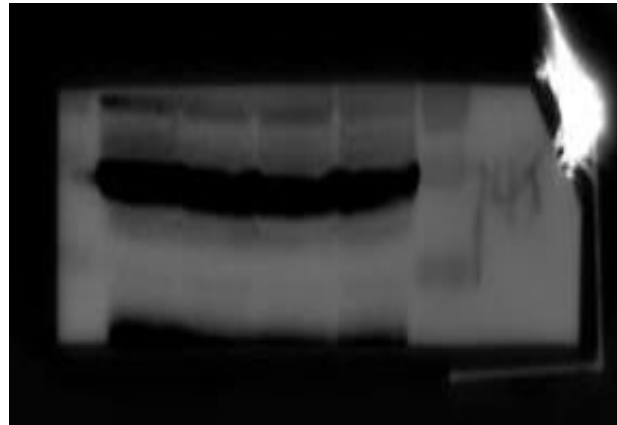

pro-Casp 1 p45

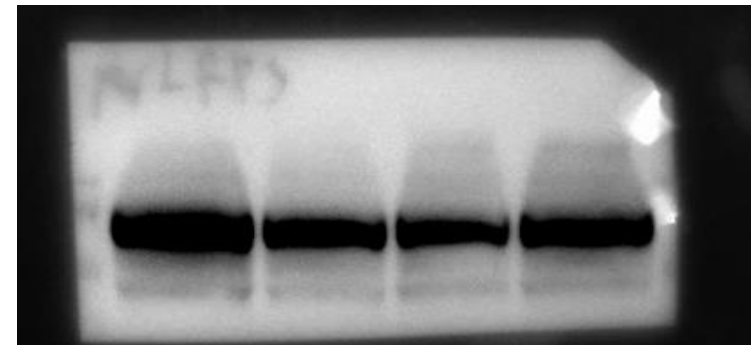

Flag-NLRP3

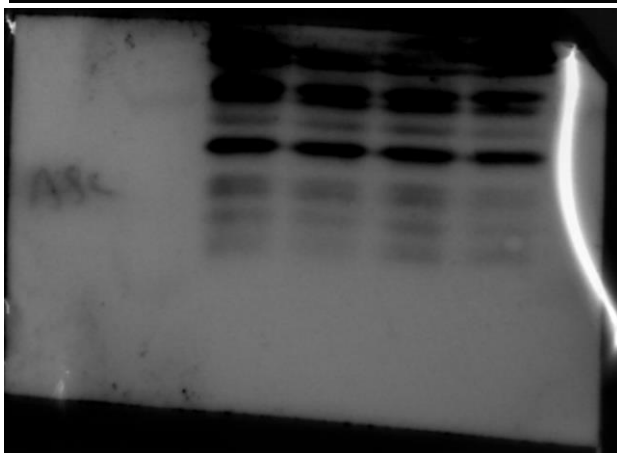

ASC

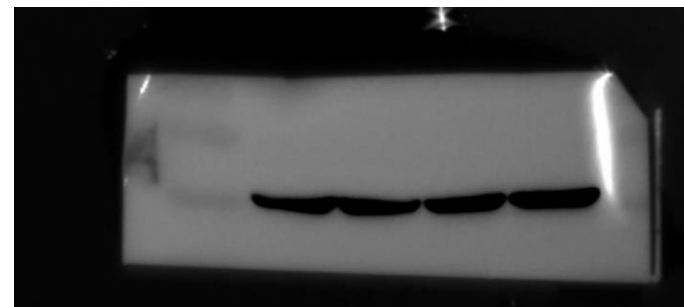

Actin

Fig. 4F

IL-1 $\beta$  p17

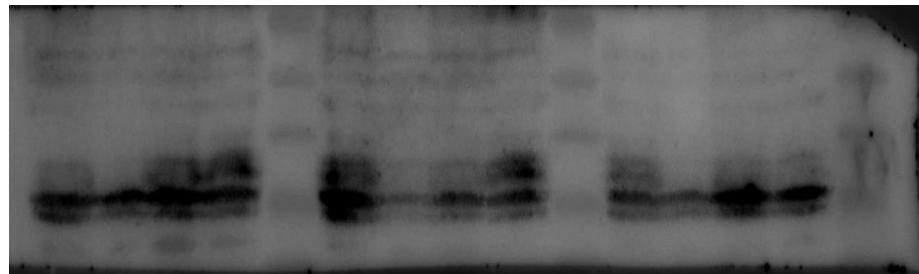

Caspase1 20

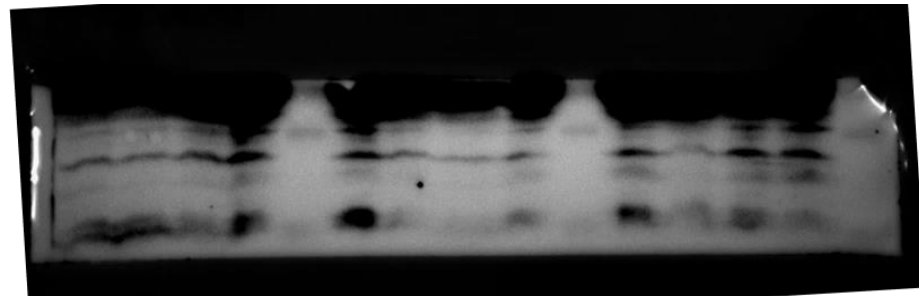

ASC

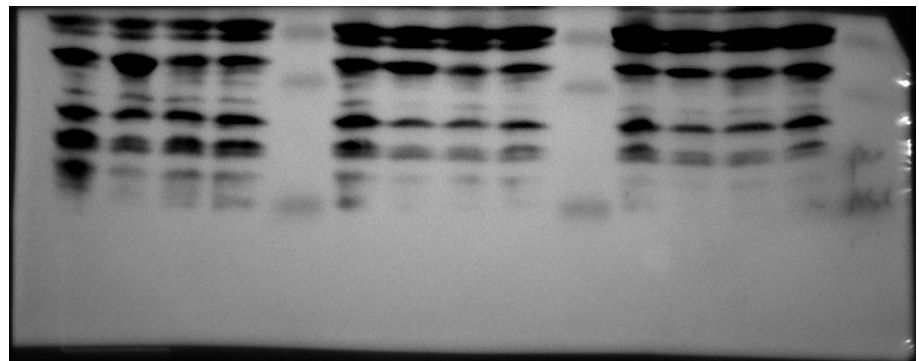

MINK1

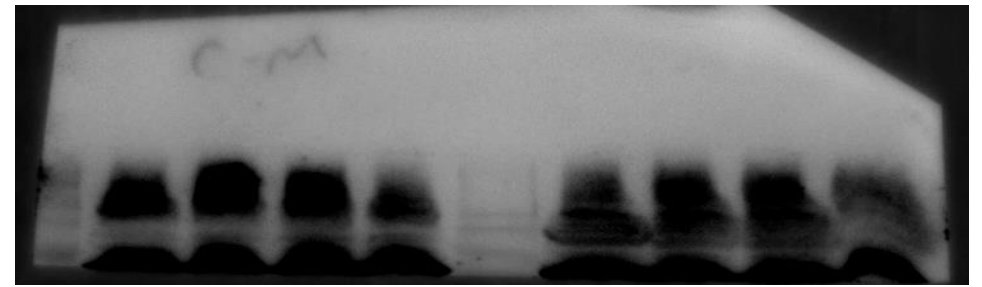

pro-IL-1 $\beta$  p31

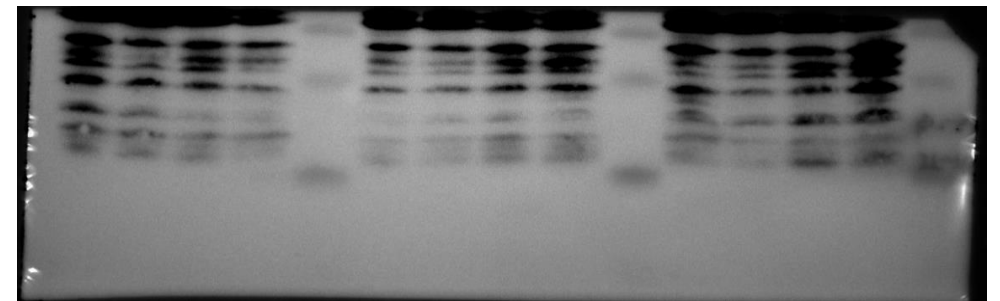

pro-Caspase1 p45

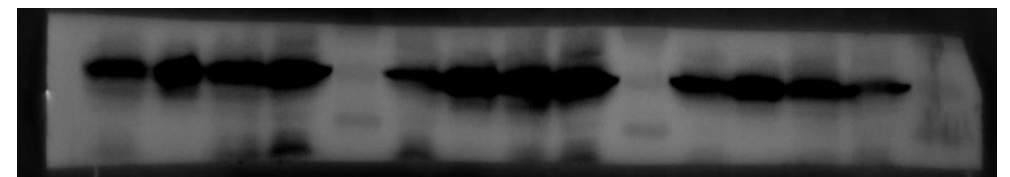

Actin

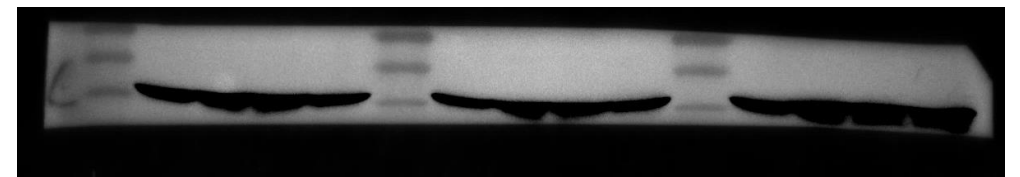

Fig. 4G

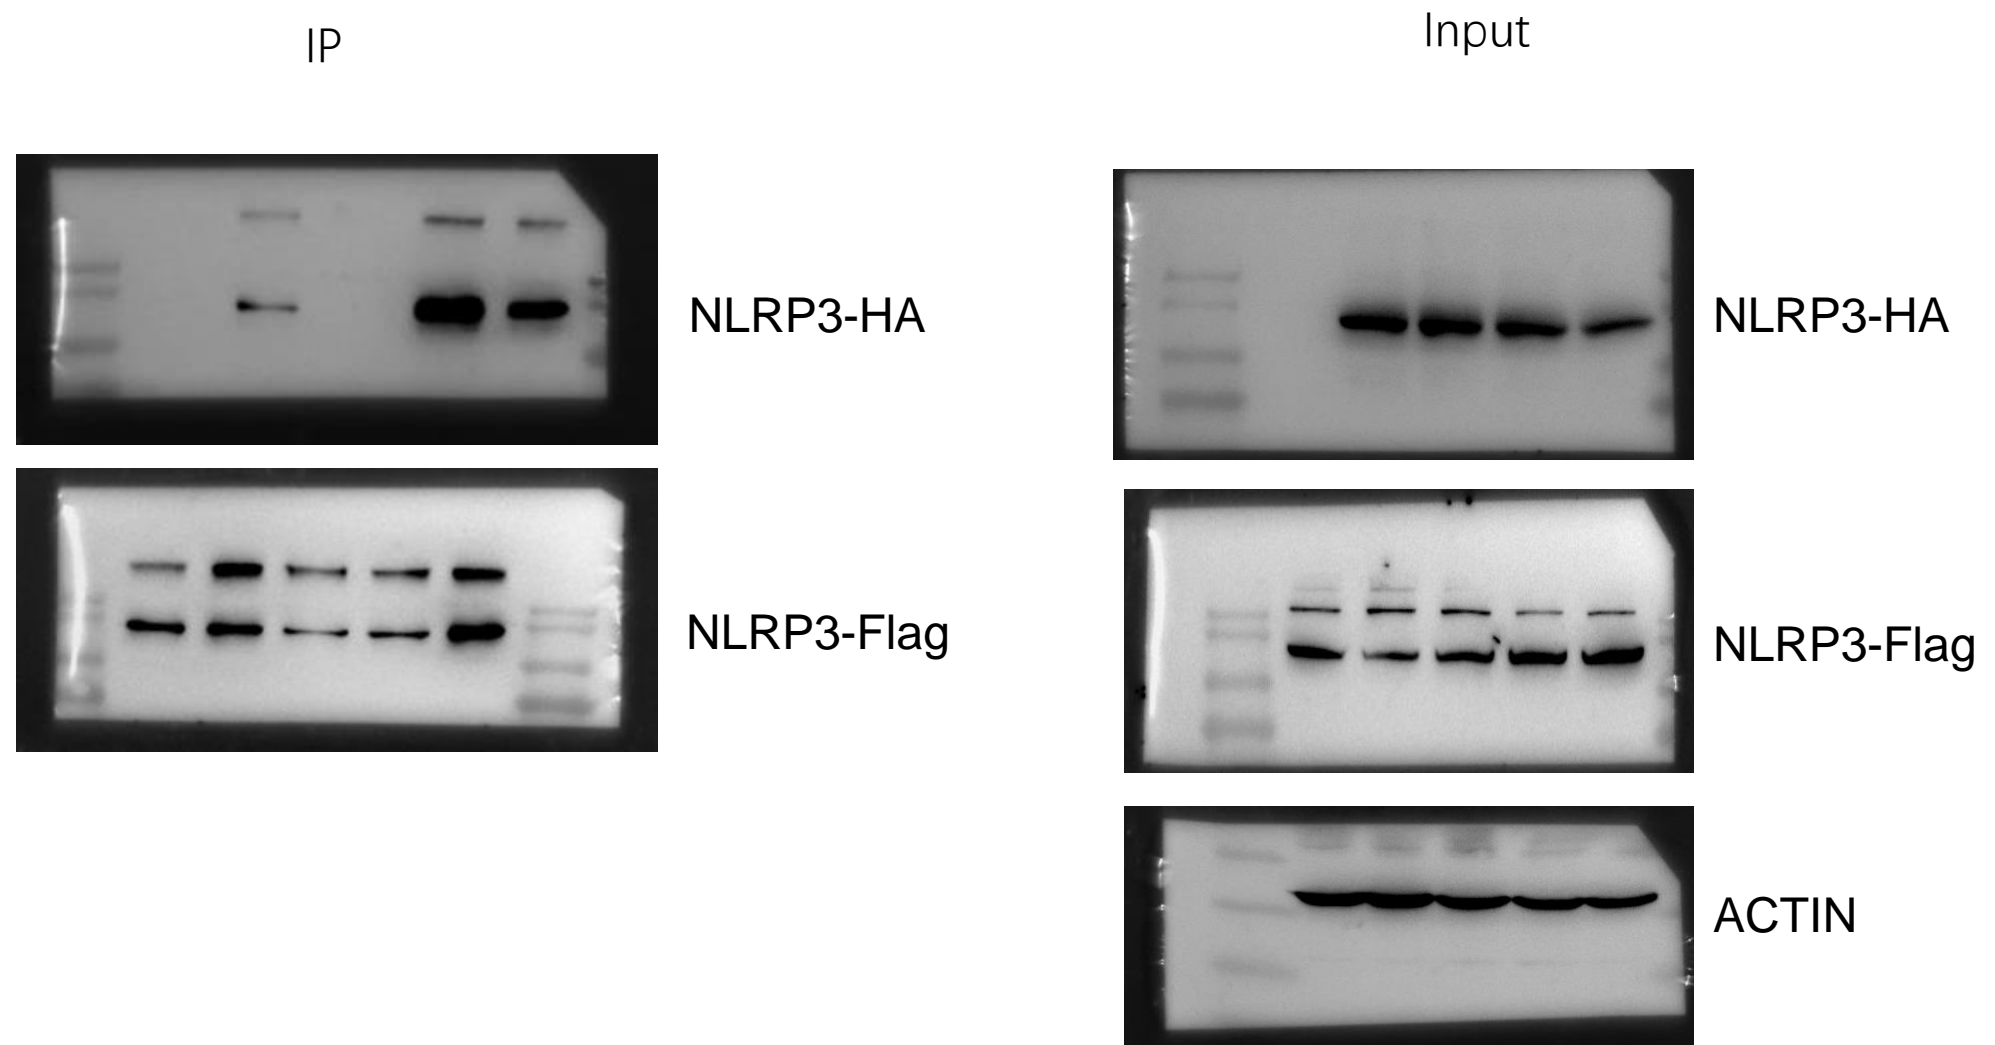

Fig. S4A

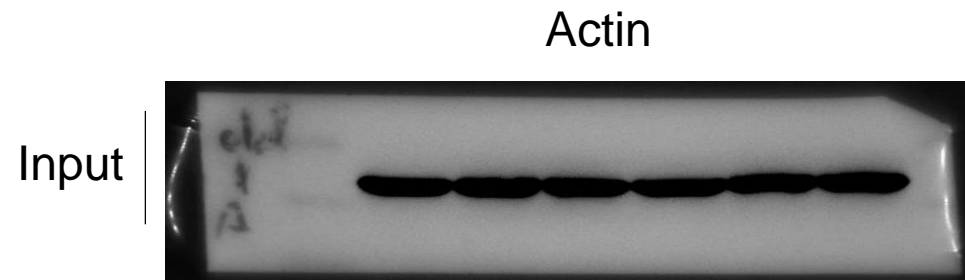

Phos-tag

Phosphorylated  
NLRP3

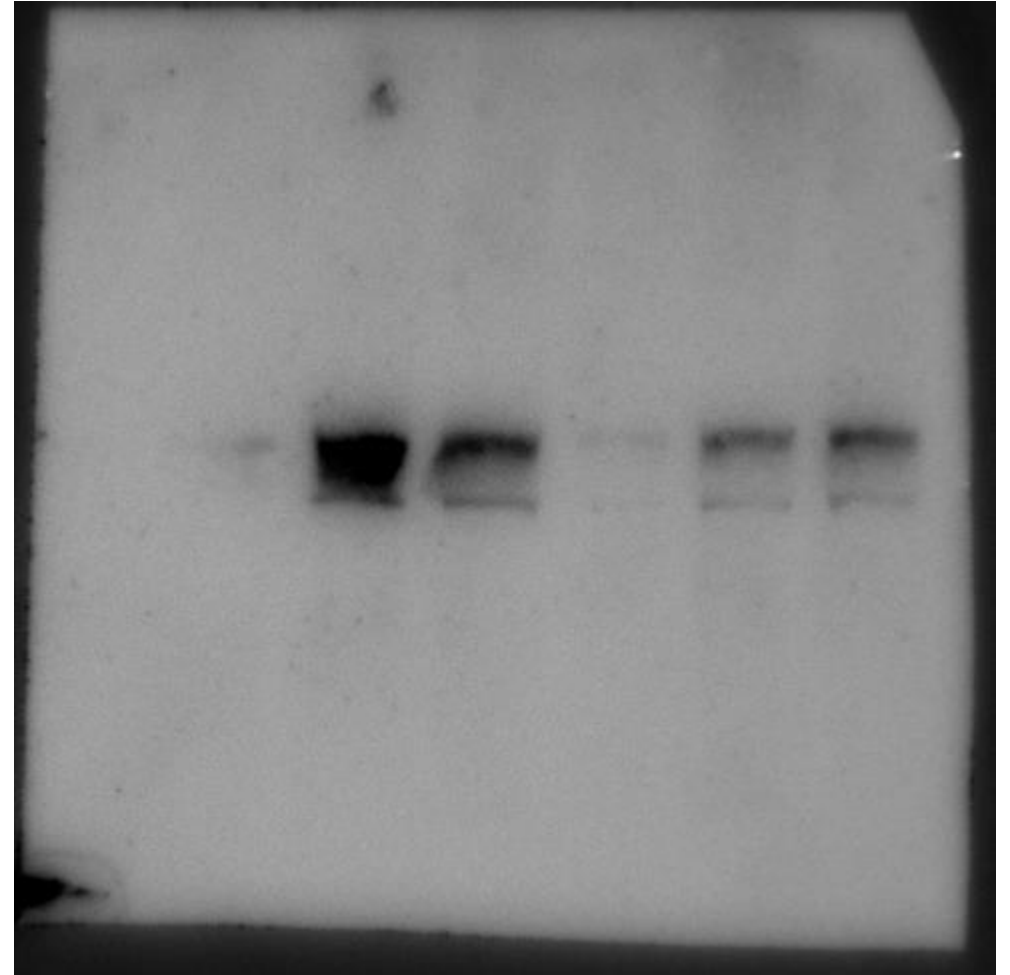

Fig. 4H

Input

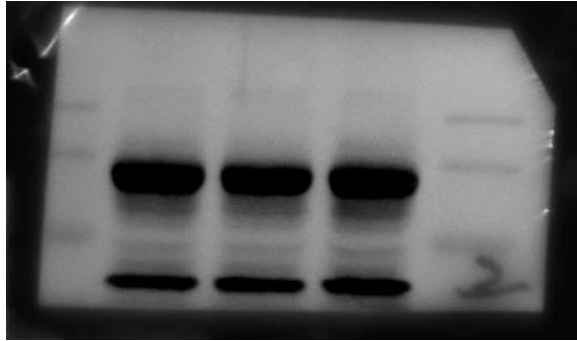

HA-NLRP3

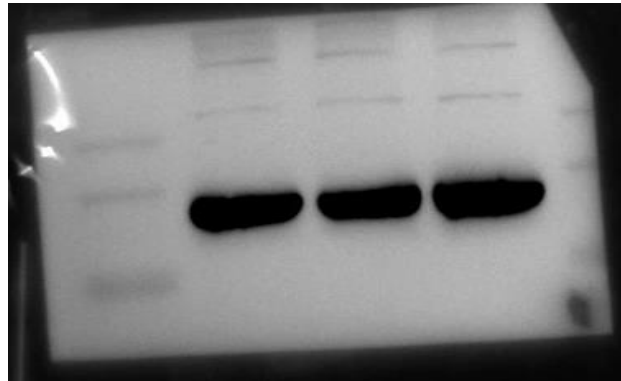

Flag-NLRP3

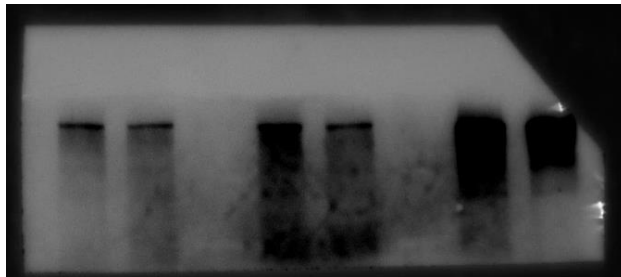

Flag-MINK1

IP: HA  
IB: Flag

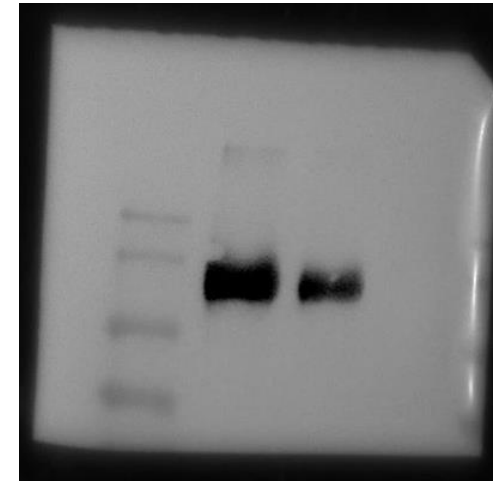

Flag-NLRP3

Fig. S4D

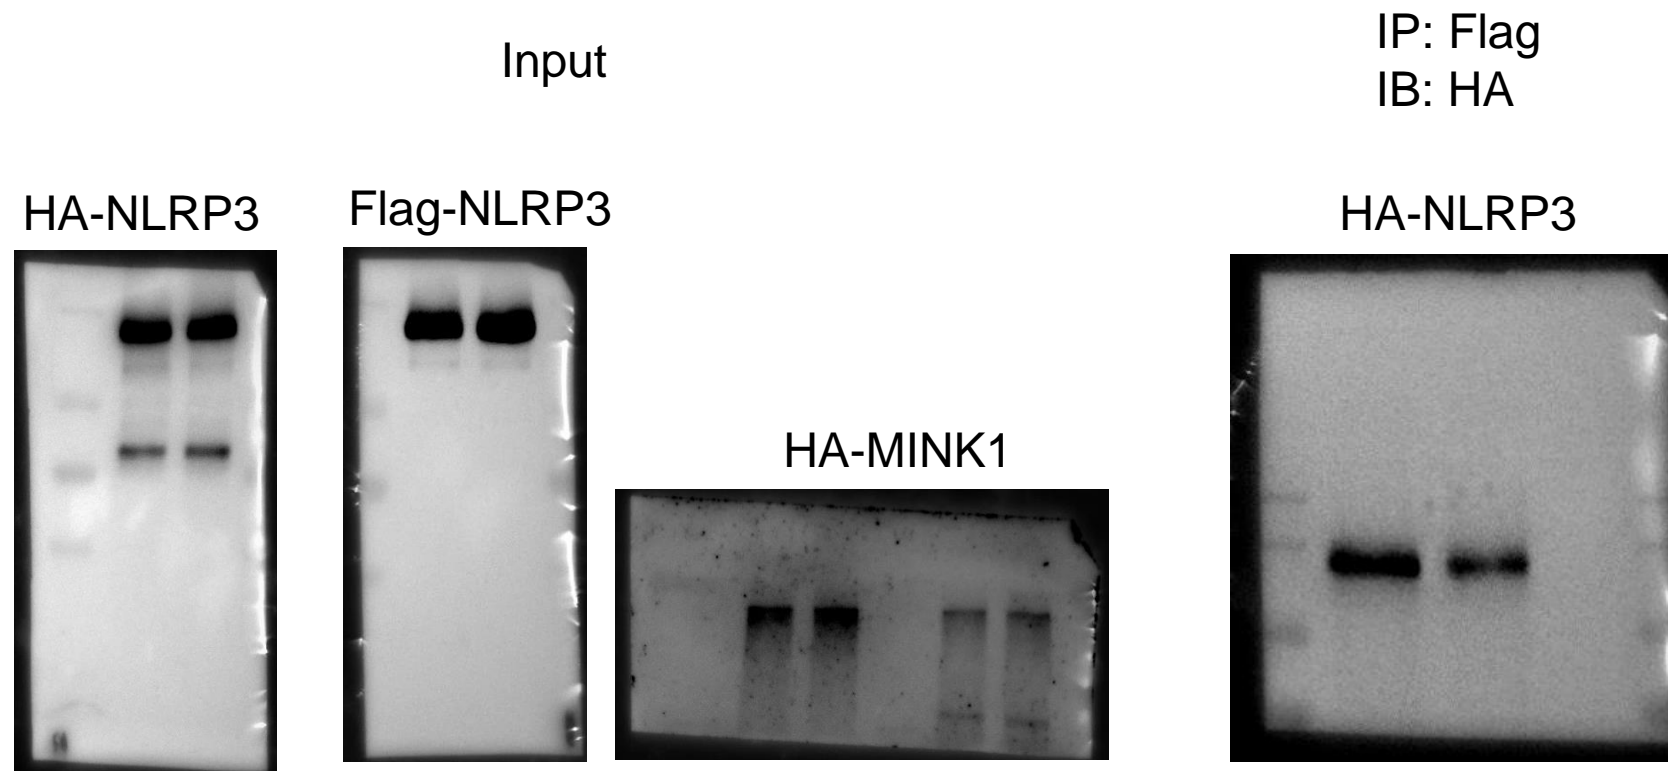

Fig. 5C

IL-1 $\beta$  p17

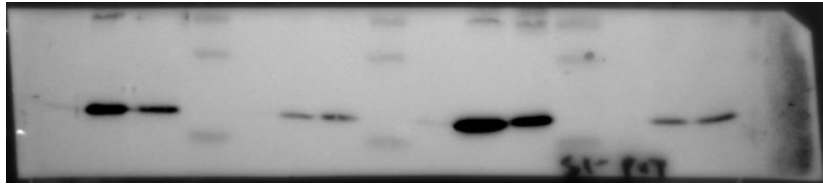

Caspase1 p20

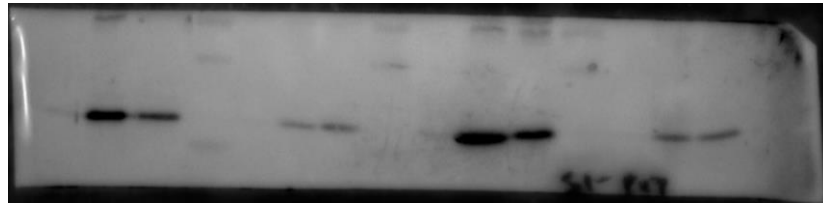

pro-IL-1 $\beta$  p31

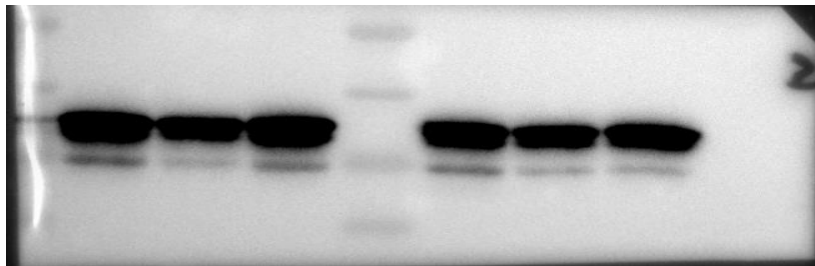

MINK1

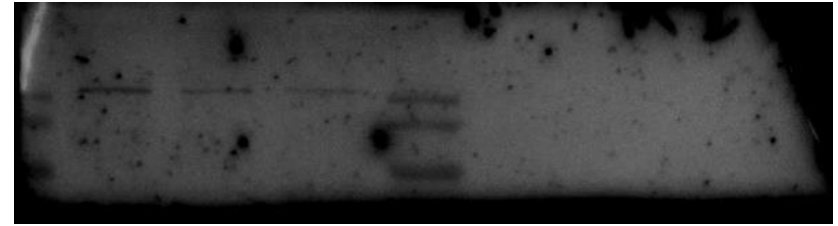

Actin

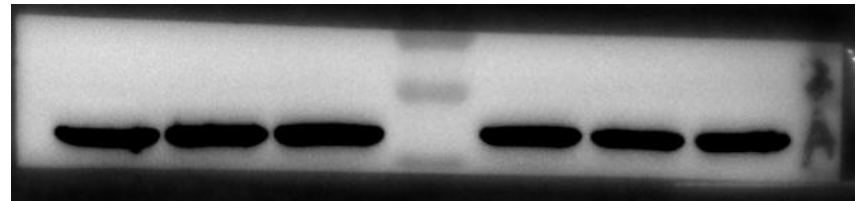

Caspase1 p45

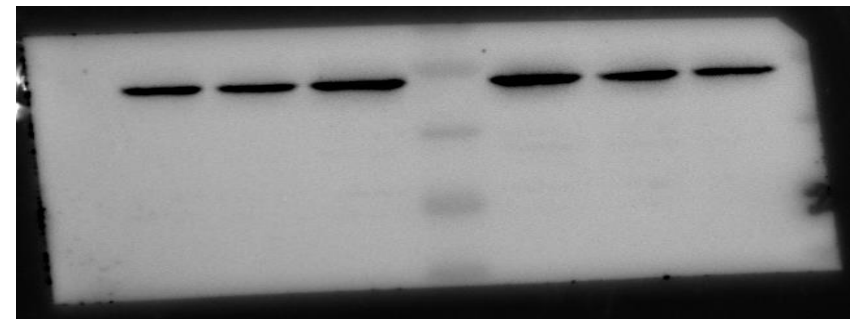



Fig. S5B

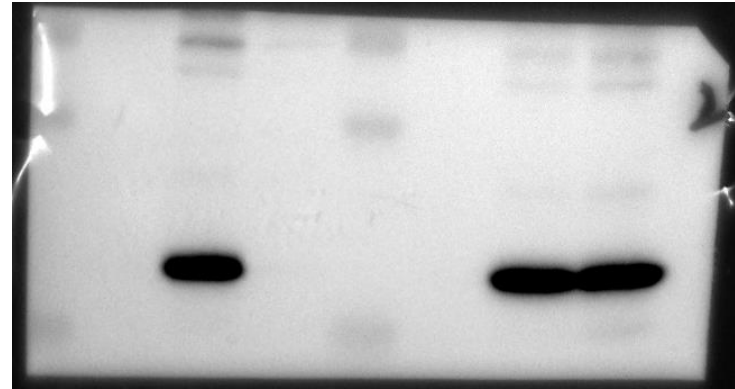

IL-1β p17

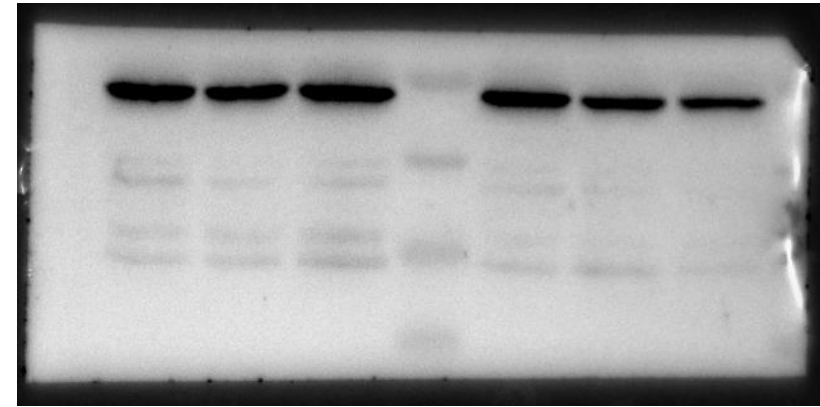

pro-Casp1 p45

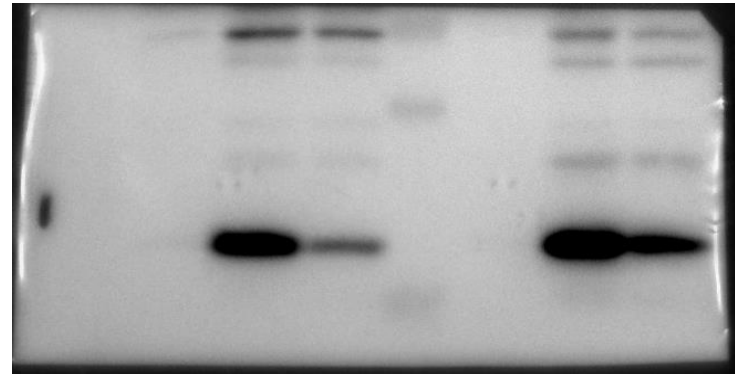

Casp1 p20

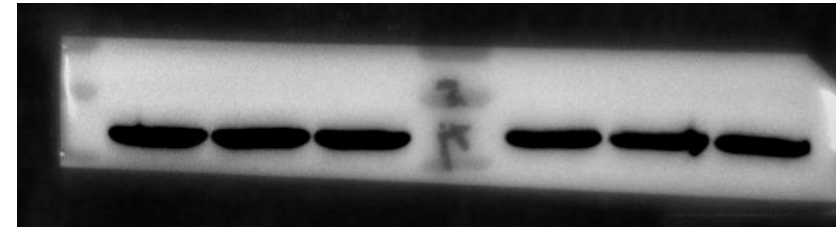

Actin

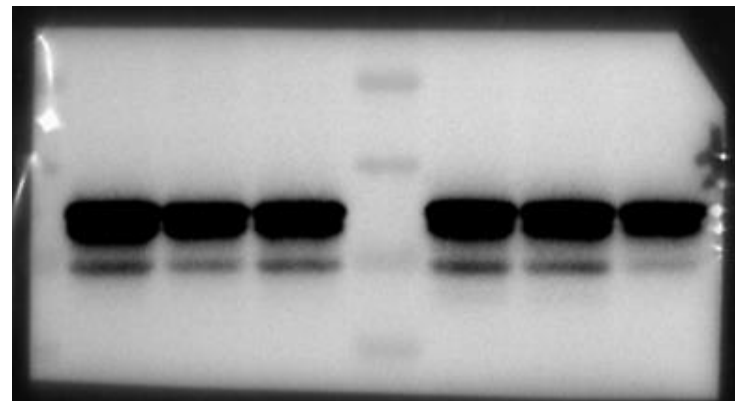

pro-IL-1β p31

Fig. S5C

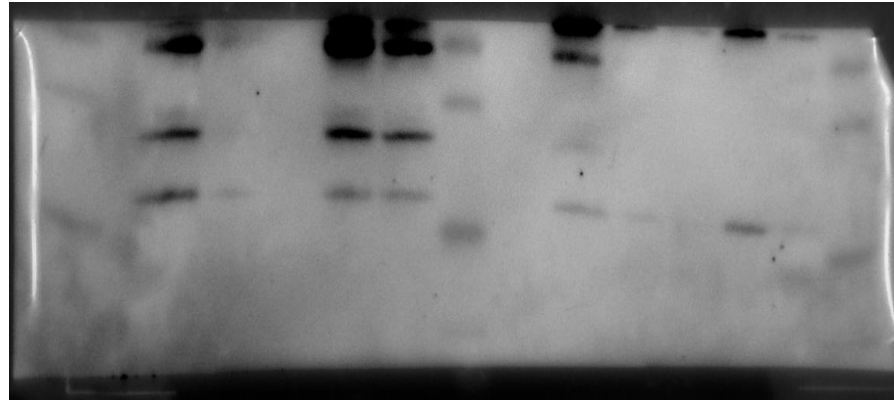

Casp1 p20

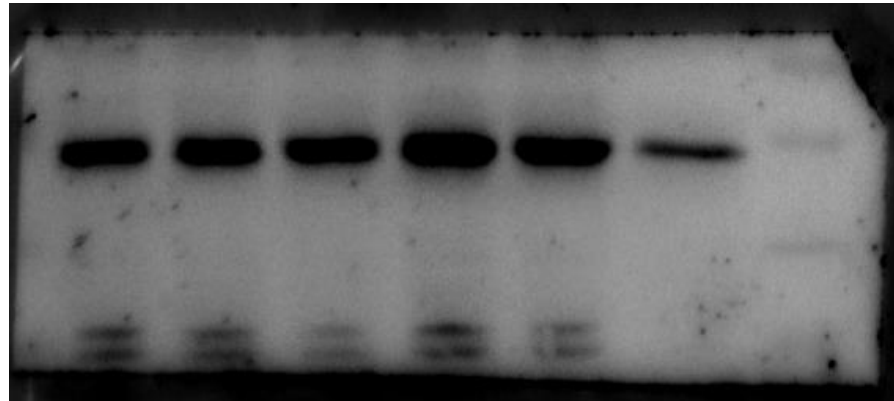

pro-Casp1 p45

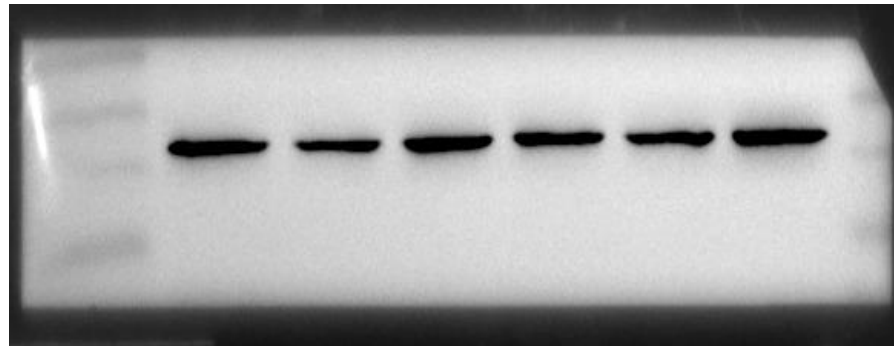

Actin

Fig. 5D

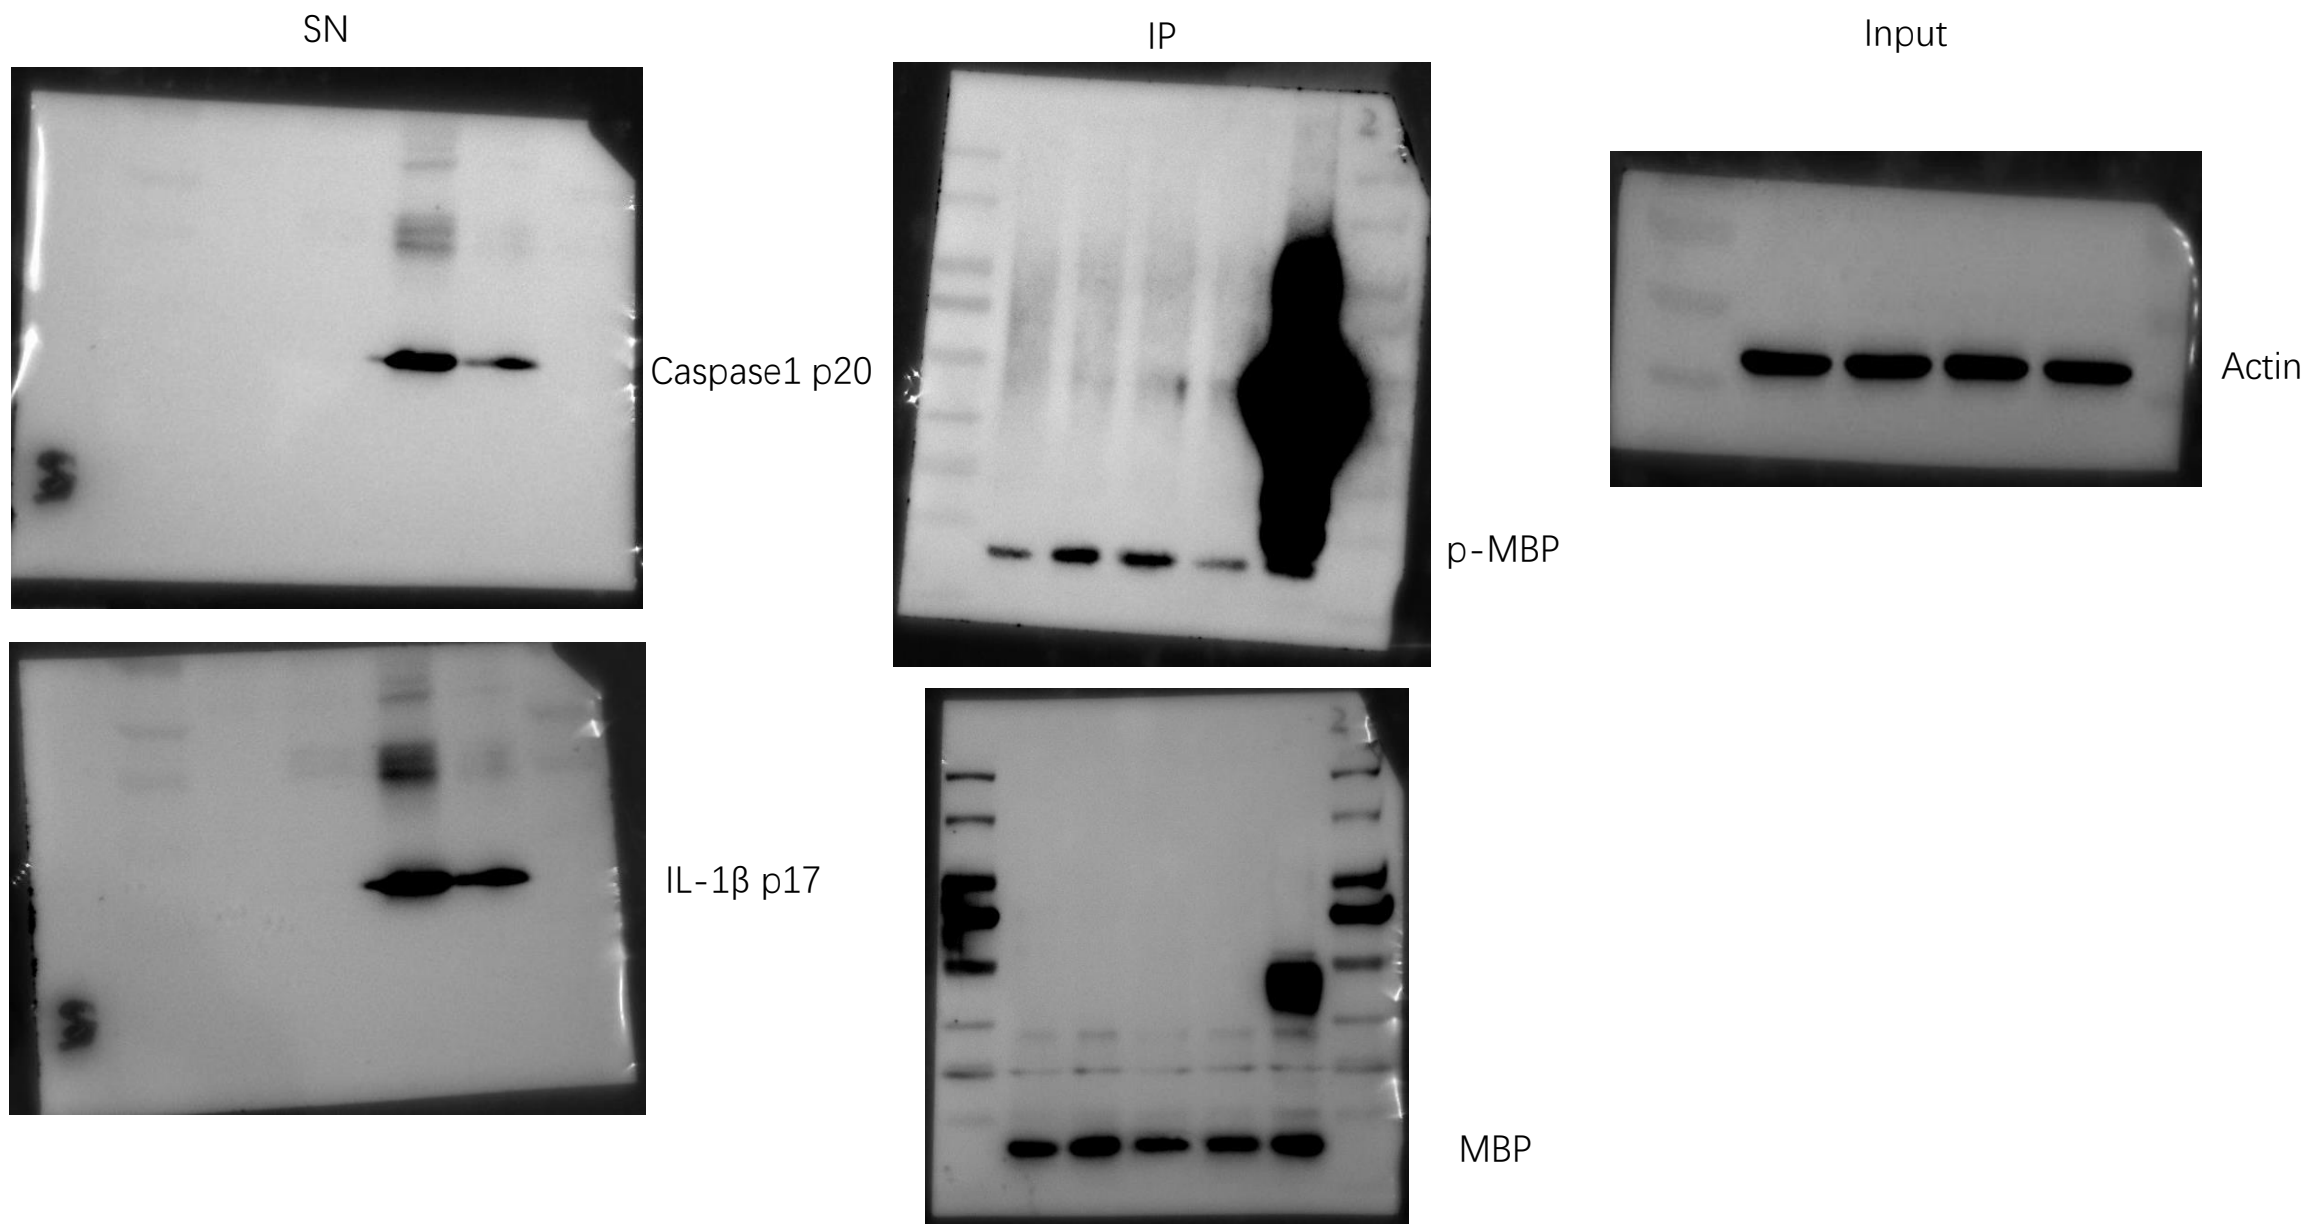

Fig. S5D

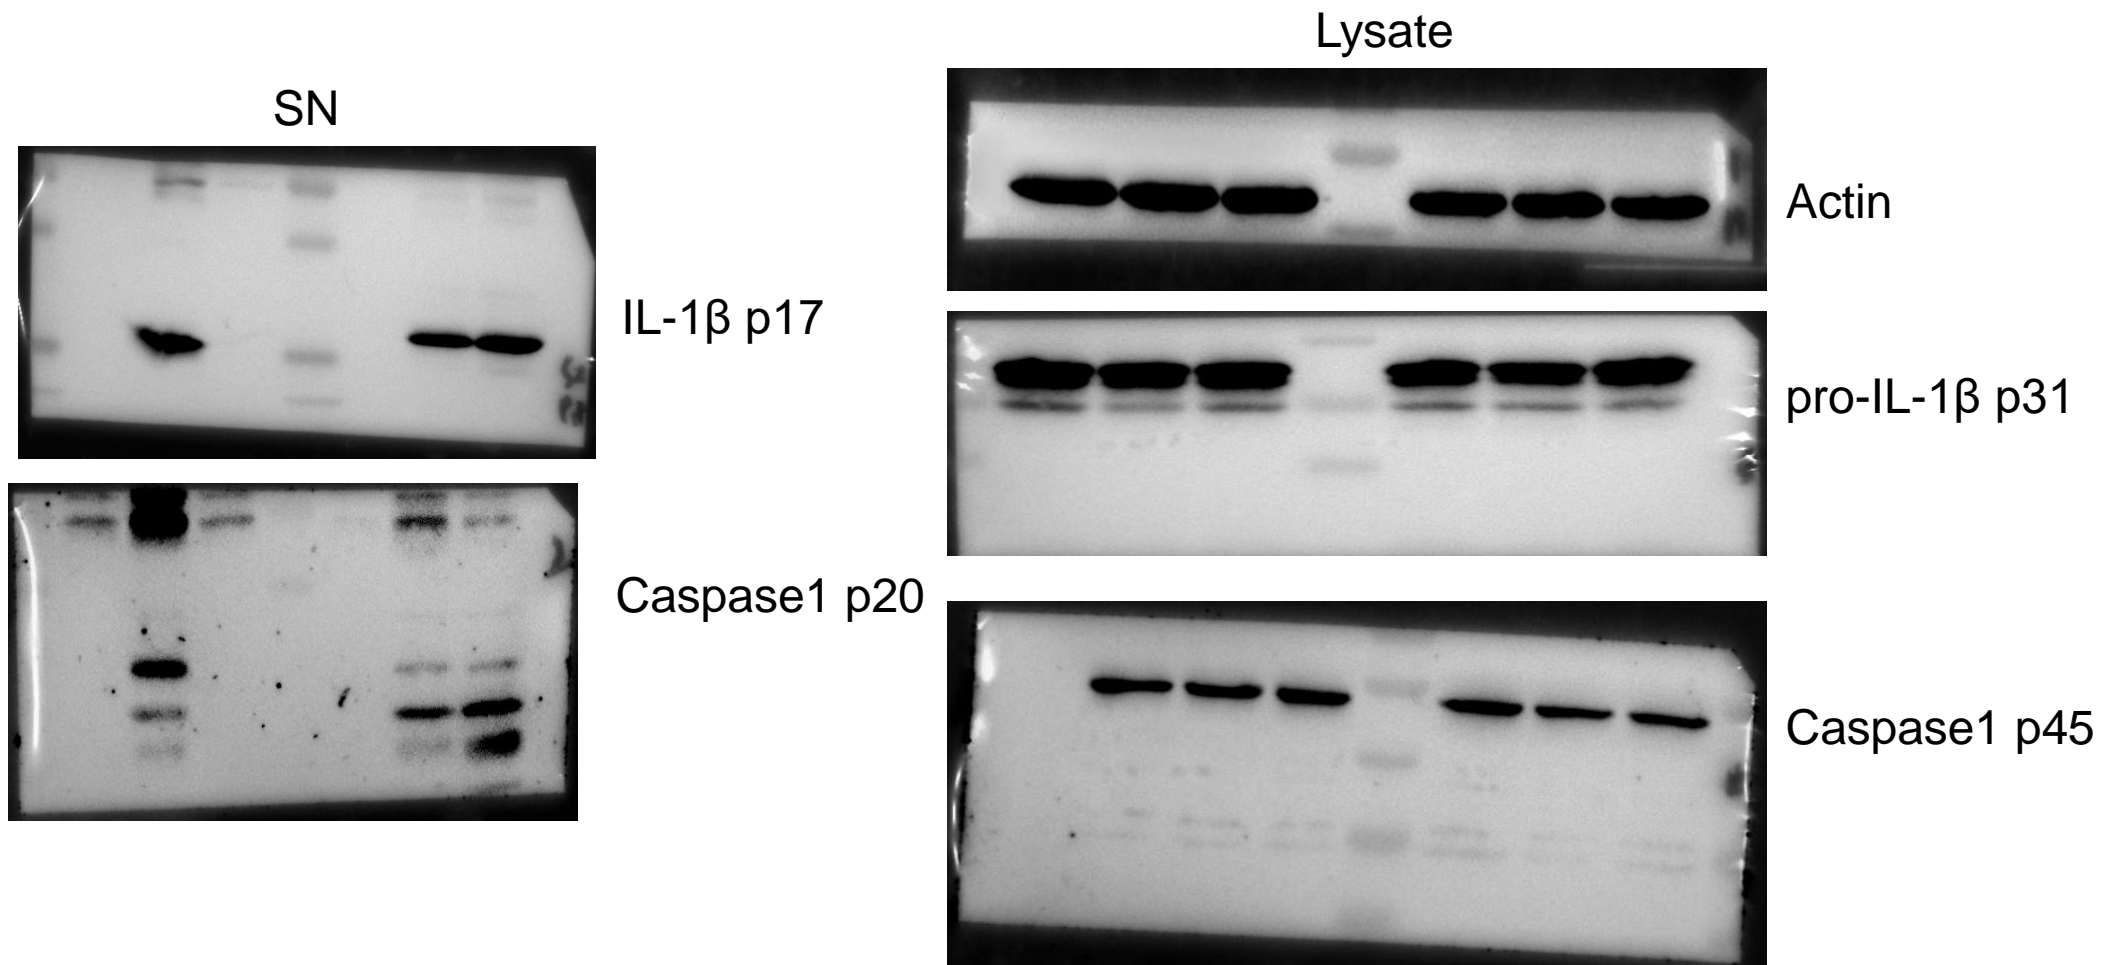

Fig. S5F

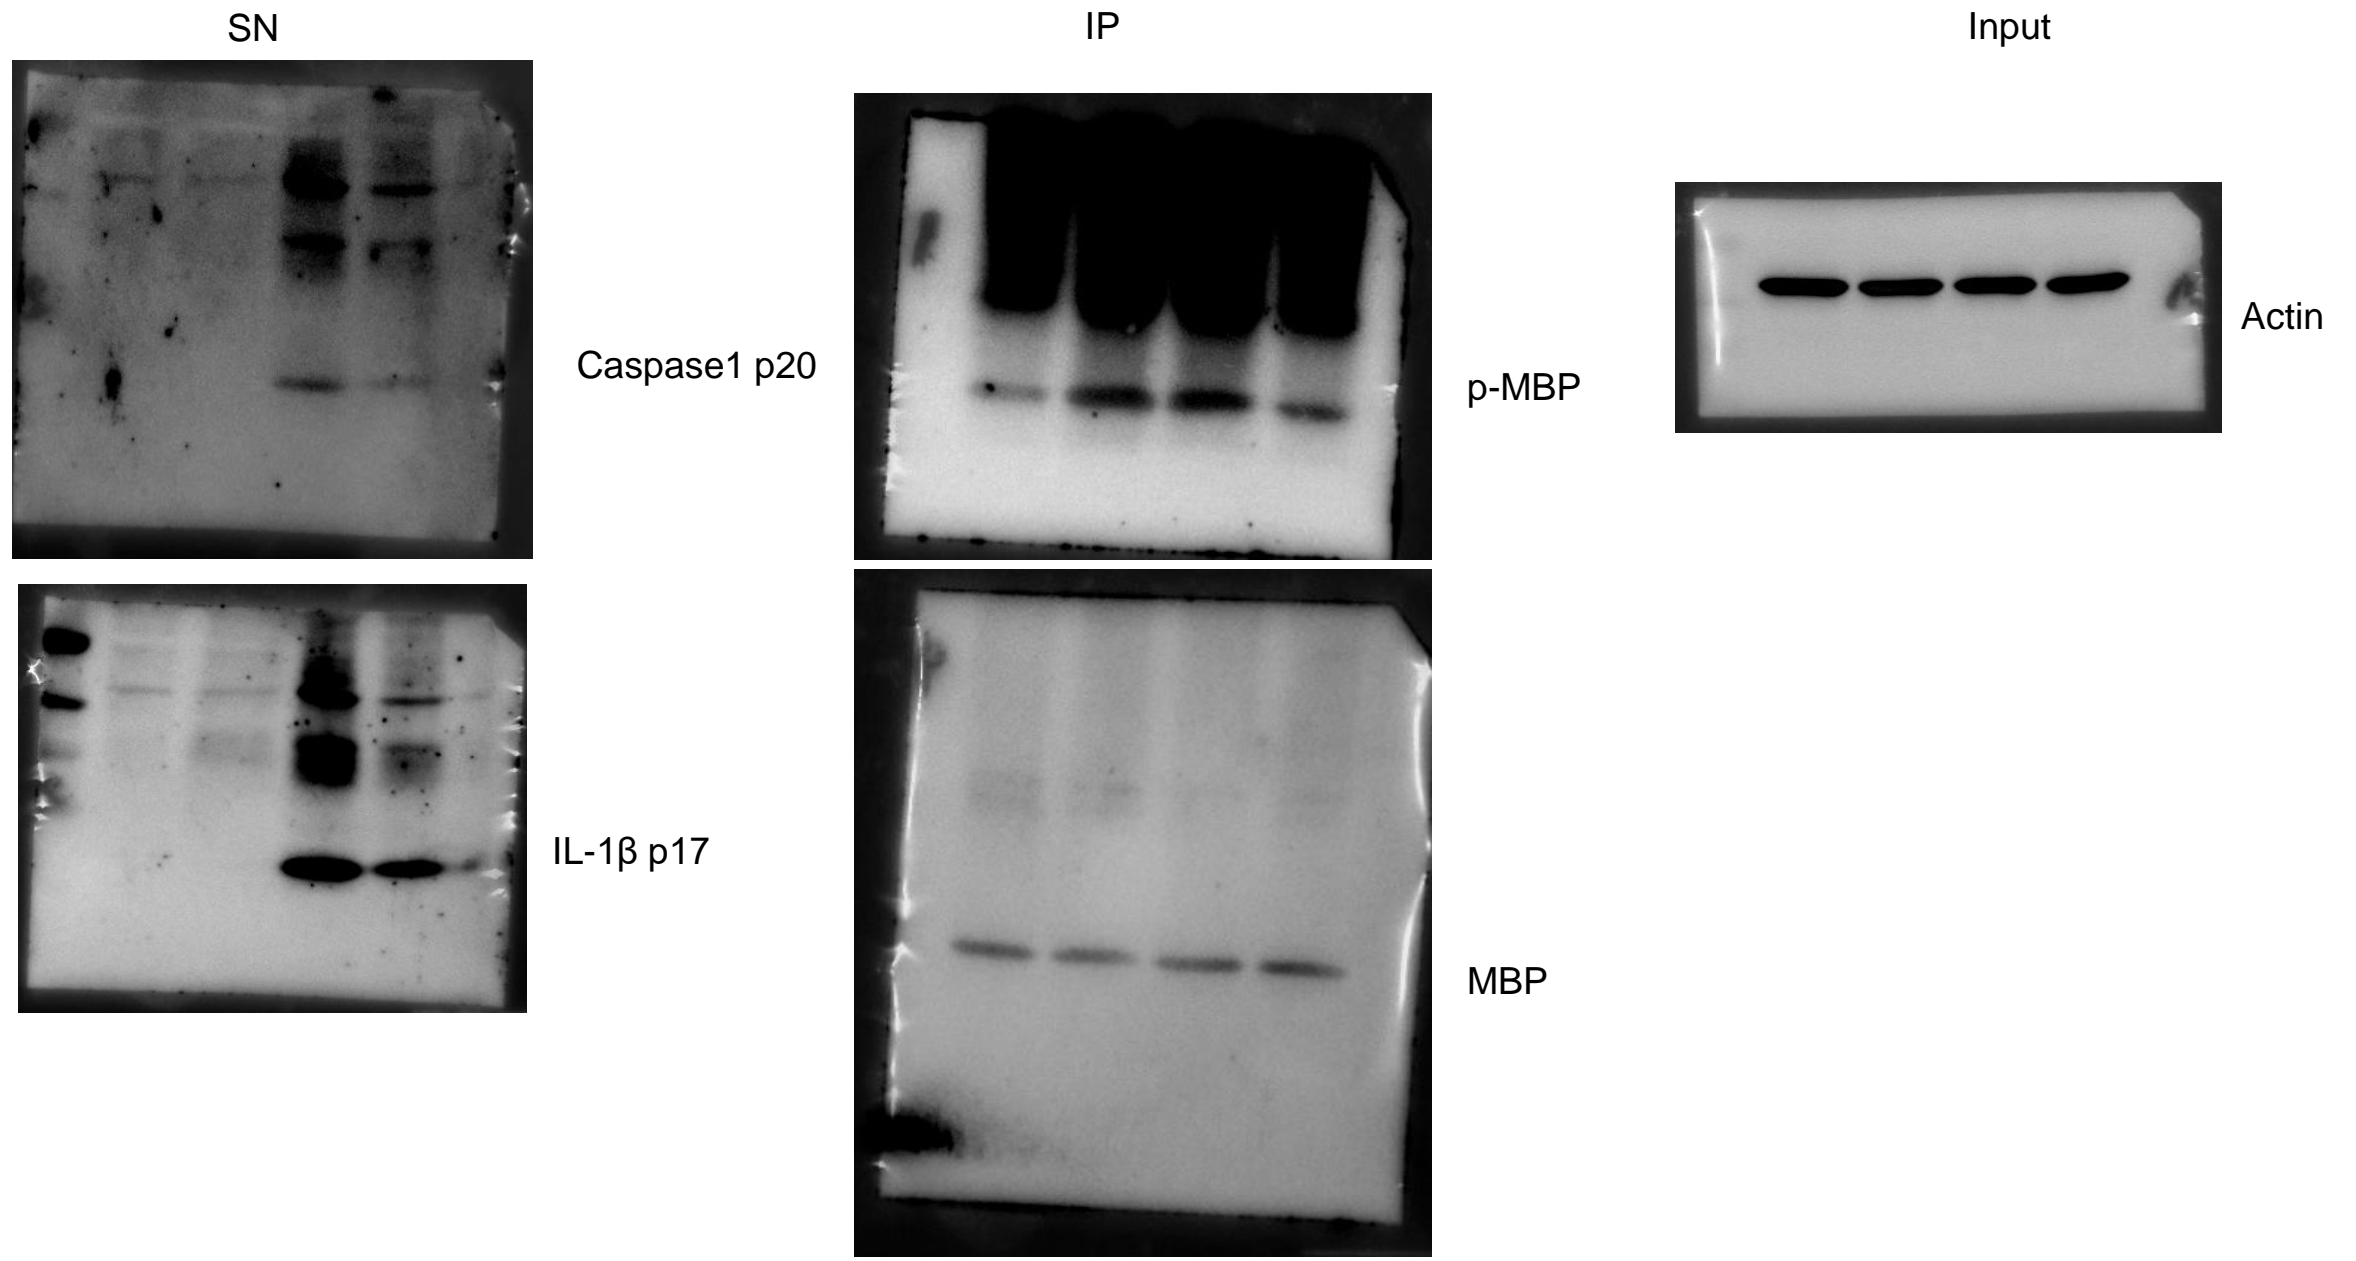

Fig. S5G

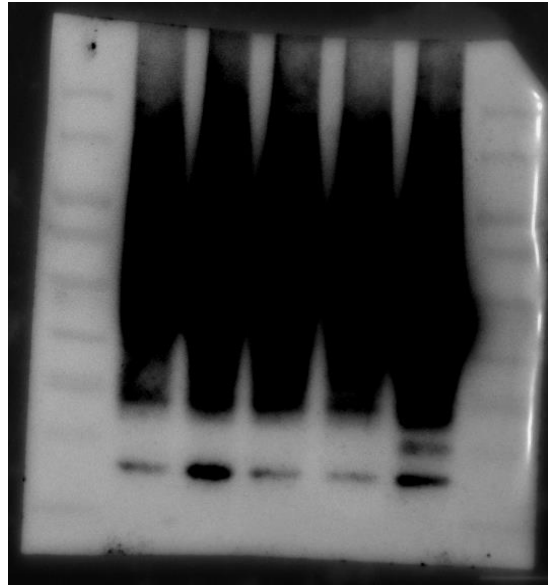

p-MBP

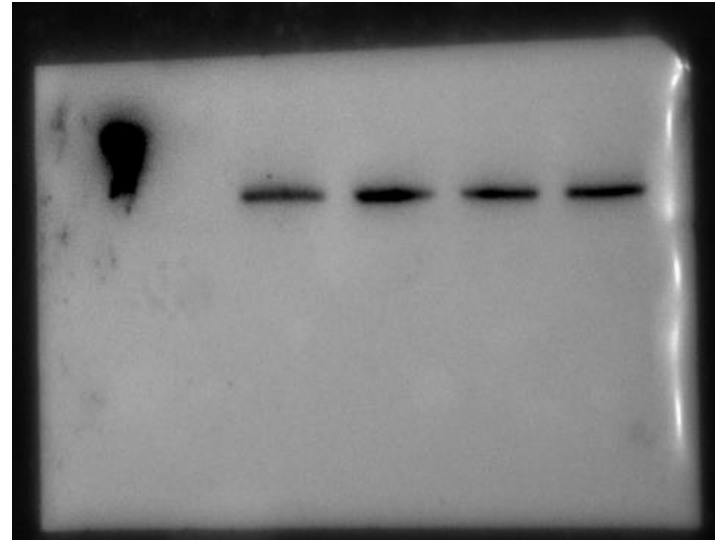

Actin

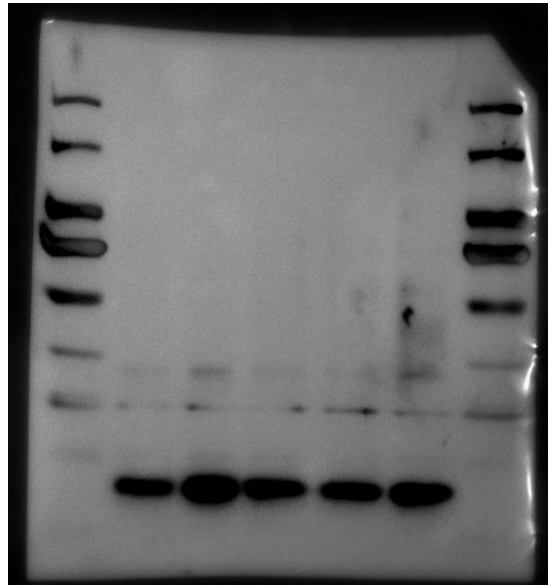

MBP

Fig. 6I

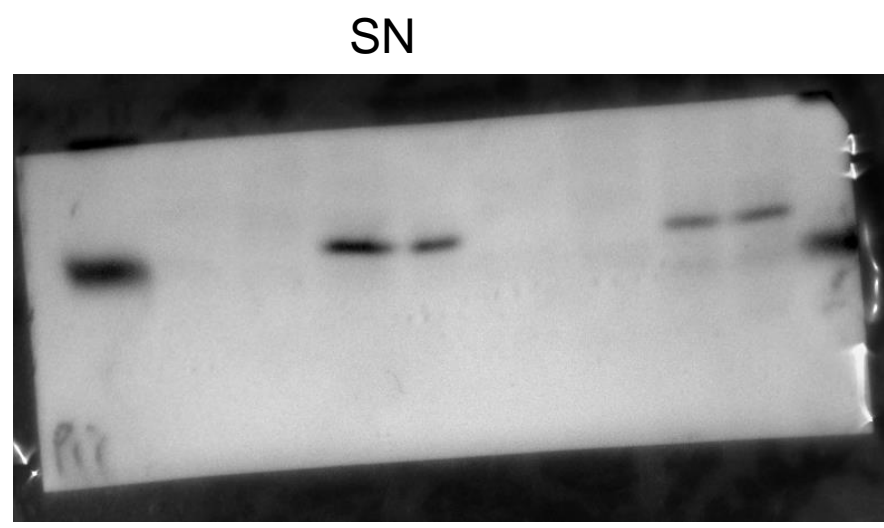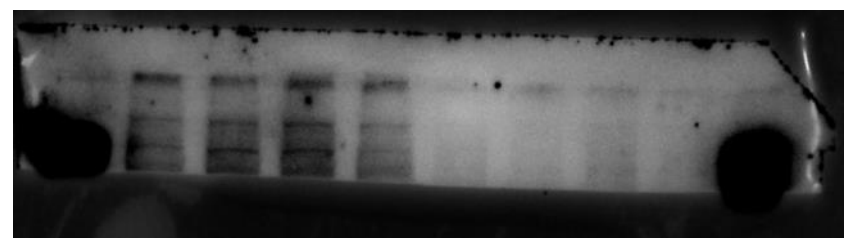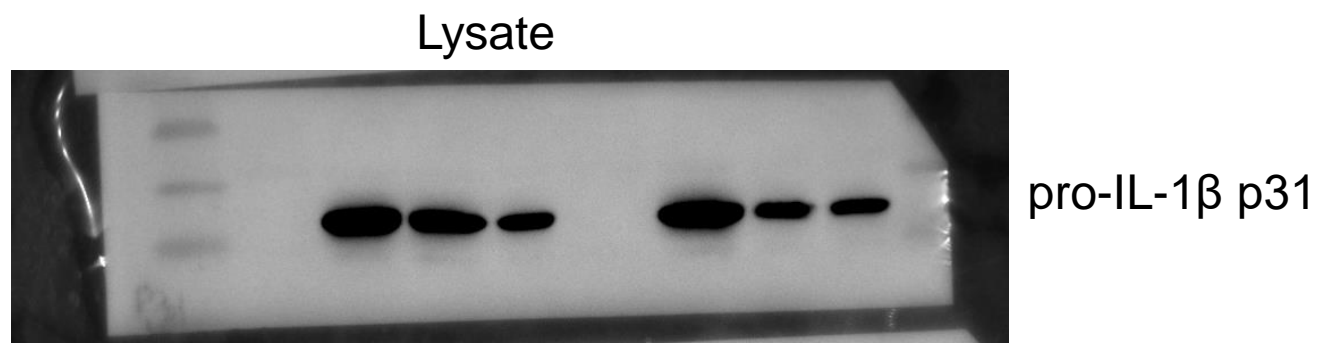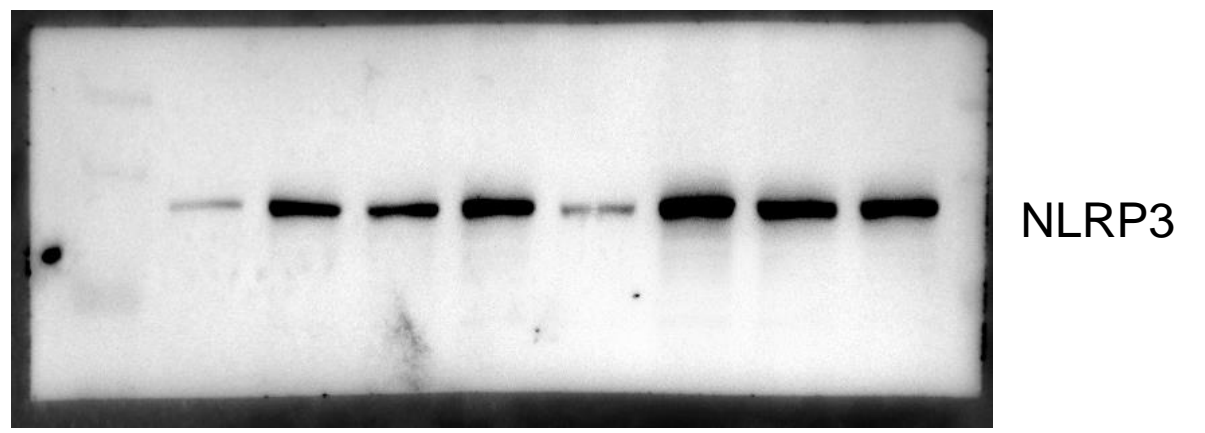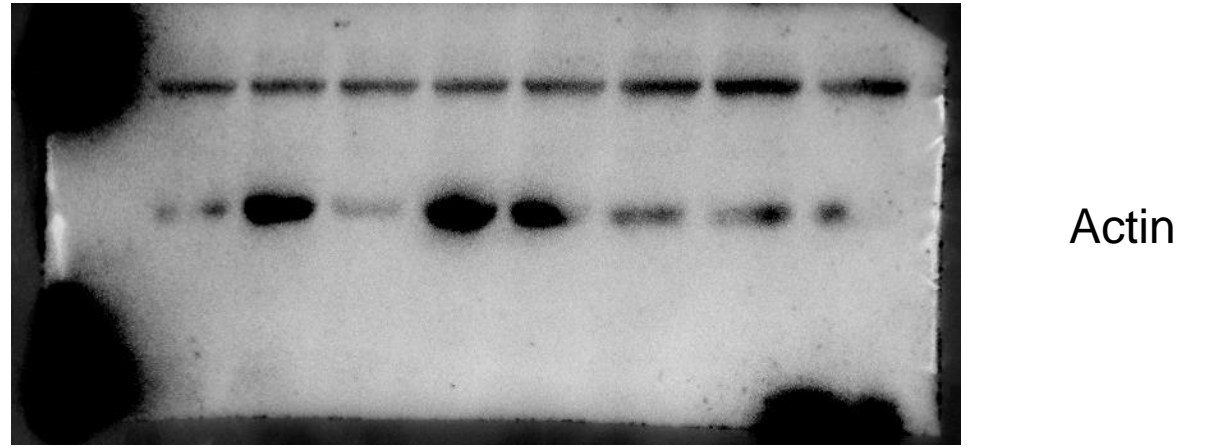

Fig. S6D

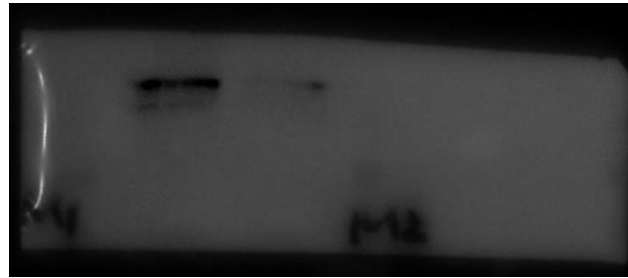

MINK1

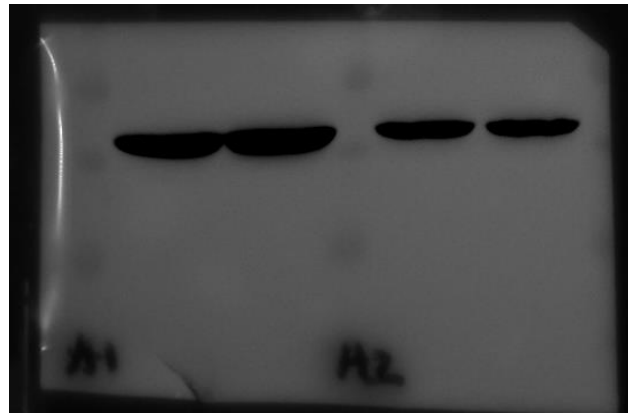

Actin
